# Supplementary material for: Genetic Variation Shapes Protein Networks Mainly through Non-transcriptional Mechanisms
Source: PLoS Biol. 2011 Sep 6;9(9):e1001144. doi: 10.1371/journal.pbio.1001144 (PMC3167781; doi:10.1371/journal.pbio.1001144)
Supplement: Table S1 — Quantitation of 354 proteins. (XLS) [file pbio.1001144.s006.xls]

## Sheet: protein_measurements_for_SOM_01
systematic name	name	peptide	1_1_d	1_3_d	1_4_d	1_5_c	2_2_d	2_3_d	2_4_a	2_5_d	2_6_d	3_1_d	3_3_d	3_4_d	3_5_d	4_1_c	4_3_d	4_4_d	5_1_d	5_2_d	5_3_d	5_4_d	5_5_d	6_1_d	6_2_b	6_3_c	6_4_d	6_5_d	6_6_d	6_7_d	7_1_d	7_2_c	7_3_d	7_4_c	7_5_d	7_6_c	7_7_c	7_8_d	8_1_a	8_2_d	8_3_a	8_4_c	8_5_b	8_6_c	8_7_b	9_1_d	9_2_d	9_3_d	9_4_d
YDR388W	RVS167	IPYFDLNSDIVESYIAK	14418.3	1380.03	11812.1	9615.5	10725.3	NA	22991.9	13729.9	21261	NA	NA	13275.7	NA	6855.86	15948.6	2598.66	13657.3	NA	8779	7919.19	12635	5211.83	8817.36	13380.5	NA	14564.2	NA	18985.3	NA	7470.16	NA	18196.4	NA	16512	NA	15315	14853	16410.7	NA	13220.4	NA	NA	9873.65	7479.29	4326.59	NA	7822.77
YIL085C	KTR7	EFPGCYKPSIK	3979.93	2264.39	1799.22	2333	3165.73	3840.01	7705.9	6052.31	1947.77	6535.86	8420.24	8871.56	7140.23	6810	NA	1046.6	3431.15	2047.88	5567.89	3700.43	4583.57	7404.44	2937.65	3468.97	9253.17	NA	5048.32	3384.3	3583.23	8756.62	4372.83	7061.49	3981.68	6742.88	1212.18	3327.66	4122.76	3796.63	3320.9	6624.77	5723.14	6057.7	7330.6	5809.4	4559.02	4396.3	3401.79
YMR309C	NIP1	AILYNIYYTALNK	NA	NA	NA	6291	NA	NA	NA	2752.7	10095.4	2244.95	NA	NA	NA	NA	NA	NA	NA	6544.24	8478.81	7943.43	NA	1908.32	NA	NA	7933.26	NA	2305.14	NA	NA	5488.96	2061.9	5400.67	NA	12898.4	NA	NA	NA	NA	17236	NA	9749.64	NA	13663.4	13394.2	NA	NA	NA
YOR020C	HSP10	VGDQVLIPQFGGSTIK	3260.79	4127.58	NA	NA	3173.64	10360.6	9855.19	2172.62	6695.16	4728.26	2518.96	9332.61	7367.48	9097.52	5873.49	NA	15458.7	4524.93	2916.39	6472.18	3064.78	NA	NA	4876.81	NA	10081.8	NA	3275.1	5708.26	8687.78	NA	4889.86	NA	NA	NA	3084.96	8848.71	9605.51	NA	NA	NA	22318.4	NA	NA	8449.07	NA	10176.8
YLL026W	HSP104	LFSLDLAALTAGAK	4848.19	NA	NA	NA	NA	NA	NA	3647.57	1197.64	3068.65	NA	NA	NA	NA	NA	NA	NA	NA	3624.62	NA	NA	NA	1615.05	NA	4961.42	9031.02	NA	NA	1977.74	NA	NA	NA	NA	NA	NA	NA	NA	NA	NA	4579.31	NA	5383.37	7490.89	NA	4426.14	13670.6	NA
YML065W	ORC1	LTWAASMESLEFYFK	2549.29	2308.78	NA	3732	4281.12	NA	NA	2583.36	NA	NA	1676.06	NA	NA	NA	NA	2818.57	NA	4556.57	1967.12	2751.92	2967.02	NA	NA	1743.76	NA	NA	NA	1224.15	1309.57	NA	2432.06	NA	NA	NA	3600.1	NA	NA	3694.39	NA	2849.95	5445.88	NA	4868.97	6111.82	1916.49	6189.03	4460.92
YGL054C	ERV14	VQLLDATEIFR	3540.71	NA	NA	NA	3153.36	NA	NA	NA	NA	3762.65	NA	NA	1522.97	NA	NA	NA	NA	1575.33	NA	NA	NA	3757.09	2726.87	3680.55	NA	2015.62	1700.8	NA	3422.99	1312.07	1195.47	NA	NA	NA	NA	NA	NA	2136.79	NA	NA	NA	6177.78	1933.68	NA	2947.56	2565.23	NA
YGR082W	TOM20	ALTVYPQPADLLGIYQR	NA	NA	NA	NA	NA	2270.7	2434.52	NA	NA	NA	958.556	NA	3063.96	NA	NA	NA	NA	1671.27	NA	NA	NA	NA	2218.69	NA	NA	2564.9	NA	NA	1605.49	NA	NA	1999.08	NA	NA	3345.13	NA	NA	3599.21	NA	2952.08	NA	NA	NA	NA	NA	NA	NA
YER094C	PUP3	AIEPETFTQLVSSSLYER	9268.35	7073.74	4368.34	3943	2129.93	3780.58	19957	11282.3	1707.31	5674.46	11694.1	30023.6	7804.51	32243.1	NA	10937.5	2847.23	NA	10745.1	1481.72	5318.27	NA	6633.99	NA	15413.3	NA	1616.08	NA	NA	8201.87	NA	17731.8	14350	3954.3	2068.4	NA	14030.9	6962.39	NA	28981	9664.9	6763.38	18682.5	15965.5	19604.1	17730.8	4592.6
YOL021C	DIS3	GTSVYLVDK	5000.87	NA	NA	NA	NA	5069.23	NA	NA	NA	13405.4	NA	6143.66	10049	6064.61	5005.93	6230.68	1902.14	4487.68	4410.37	NA	NA	NA	NA	NA	NA	NA	4637.77	NA	NA	7612.4	5185.02	NA	4607.24	8286.01	NA	NA	6707.58	9819.79	3787.74	2577.22	2309.31	NA	NA	NA	NA	NA	5599.92
YDR174W	HMO1	DSLVSSLFELSK	3620.62	1534.83	NA	NA	NA	3307.47	4158.43	NA	NA	NA	NA	NA	1846.11	NA	2444.72	3748.31	NA	3237.42	1189.32	NA	NA	NA	NA	NA	1155.18	3263.31	1792.74	NA	NA	NA	NA	NA	2055.7	NA	2681.63	NA	1866.52	2215.11	NA	2525.3	1718.7	4852.79	NA	1112.03	7153.6	6817.63	3948.94
YBR249C	ARO4	ELASGLSFPVGFK	8264.72	12515.9	9479.49	5827.5	7912.58	8313.96	41301.6	NA	5509.85	3513.21	4418.16	58237.7	10162.3	65458.4	8046.93	12786.6	54903.4	9712.76	4218.04	3998.43	8904.1	4674.77	5532.65	12099	13761.3	7383.71	7292.62	8232.71	4025.11	4383.43	4770.11	5609	32735.9	8662.89	6741.89	2994.38	68740.9	12478.1	6611.9	6879.81	8849.18	67807.1	6203.05	5341.76	46745.5	9490.13	49210.4
YML126C	ERG13	LEVGTETLIDK	NA	7099.92	NA	7172	6881.73	6415.89	8389.74	2968.9	5736.43	3744.36	12507.8	8239.47	8114.93	6397.86	7068.72	1252.12	11721.8	5896.65	2816	NA	4927.23	7040.17	12220.2	2622.16	NA	9999.03	2155.52	9643.14	3255.61	10013.5	2003.14	1997.5	NA	8884.55	8710.7	3601.97	9975.93	9334.13	NA	7754.48	NA	8320.84	10507.2	7022.78	NA	6330.78	5523.86
YCR012W	PGK1	ASAPGSVILLENLR	345105	292084	257573	285340	265692	288665	313555	340555	348142	393041	337180	333309	312755	374487	170854	301970	287045	269794	450567	316121	346971	322588	266566	419350	378382	374071	361589	399917	323223	191751	2969.91	380286	334811	180710	368460	370775	389996	338734	378566	257737	330464	408075	336288	335750	467979	306669	402300
YOR369C	RPS12	VVGASVVVVK	23348.7	12787.4	17188.4	15835.5	26392.7	15912.4	16046.4	20592.6	9177.26	21087	23016.6	14347.2	20091.1	11996.5	17500.8	7700.98	13429.5	11616.7	13553.7	19723.9	27306.9	28472.4	29272.8	24658.8	23196.1	7352.4	18956.2	14462.6	22372	20024.2	17654	8172.56	13358.3	14132.7	6746.04	22409.6	12734	19868	6143.48	24927.8	20717.6	11390.2	14866	14990.7	10329.5	14918.3	11478.4
YOL040C	RPS15	LLEMSTEDFVK	128065	108804	108092	97002.5	115683	107862	NA	101042	76238.3	85113	96480.9	86217.6	135982	53380.5	98495.6	78153.2	83933.2	100605	93607.4	128848	111657	106464	106624	122816	102429	97955	NA	84745.1	84940.1	95248	73223.5	97639.8	97573.5	107925	97626.9	86432	81173.9	139949	116207	102165	91393.2	95108.5	129259	129521	100861	102523	92343.1
YBL045C	COR1	ANLLSSSNFEATK	142707	109109	93229.6	101809	97889.3	77470.4	118962	85718.7	73310.7	82721.2	84443.5	88719.9	116075	78797.7	67372.8	80602.1	67879.8	132738	123829	102941	128153	96978.7	117804	73632.5	145772	69463.6	79203.5	72391.2	67804.2	96986.3	78004.9	157178	115797	88456.4	63769	73647.3	96554.6	117123	86924.5	133292	159518	52495.7	96549.6	106649	124746	111224	122317
YBR126C	TPS1	SVVNELVGR	NA	3007.62	NA	2936.5	6572.72	4692.82	NA	5157.44	3740.88	5888.42	NA	1259.22	NA	NA	5844.77	2363.2	3498.47	4975.54	NA	6448.49	6239.92	4487.38	7689.53	5484.47	2393.23	3001.67	4681.48	4894.29	5560.52	NA	5311.12	NA	3840.72	4379.55	5001.78	7520.56	NA	2962.36	2080.87	4703.12	3672.03	1346.29	3849.55	4945.41	NA	3840.09	2892.66
YGR061C	ADE6	LSVAESLLNIFAADVK	NA	NA	NA	2021.5	NA	1121.2	NA	1586.36	NA	NA	NA	NA	NA	NA	1426.62	NA	NA	2984.81	NA	2641.75	4597.17	2991.2	NA	4097.68	NA	1328.36	3298.4	6367.58	3893.88	NA	6243.99	NA	NA	NA	4621.39	4293.74	NA	NA	NA	NA	NA	5328.36	6862.45	2617.94	4457.65	2113.27	2157.73
YOL143C	RIB4	LGKPLDVVIPIGVLIK	NA	NA	NA	NA	3975.57	NA	NA	NA	NA	NA	NA	NA	NA	NA	NA	NA	NA	4237.63	NA	NA	NA	NA	NA	NA	NA	3042.54	5407.95	NA	NA	NA	NA	NA	NA	NA	NA	NA	6135.58	6829.15	NA	NA	NA	10507.7	NA	3314.65	7613.89	NA	8629.49
YOL039W	RPP2A	YLAAYLLLNAAGNTPDATK	48719	45660.1	50179.1	35828	55480.5	50002.2	NA	42240.6	46857.4	43130.8	49004	43686	81858.6	42175.9	62629.1	49828.1	35171	62435.1	39099.9	41647.8	60360.4	42171.6	52079.8	63340.9	53757.6	64476	63878.7	58592.5	55525.3	35548.2	49486.9	43407.9	41288.7	48790.6	73614.9	62418	37649.9	81368.4	54023	63244.3	68903.7	51311.5	59225.3	50445.8	60562.2	54024.4	44138.1
YLR340W	RPP0	TSFFQALGVPTK	126542	107199	108758	103335	123374	112153	99251.3	102046	102663	107634	99611.5	77564.2	124642	75337.4	122426	113965	90041	122914	91723.3	101368	111536	104074	111128	138403	106485	116524	114004	107010	110865	110747	111283	115484	113094	119165	129401	124651	81417.4	139074	NA	105459	91747.6	97409.4	84347.9	82924.4	100313	91318	84117.2
YLR448W	RPL6B	EANLFPEQQTK	8158.35	10090.5	12543	9121	NA	9653.09	8356.73	11277.4	5517.04	16866.5	15459.7	9230.36	12073.6	10137.6	14831.6	20525	20320.7	12519	5755.25	12376.5	NA	19584.6	24972.2	8656.63	7496.36	17492.6	15448.3	8002.84	19390	18196	16828.7	2158.48	12320.5	13269.9	3736.58	21417.9	11834.7	8003.32	7576.01	7169.08	2278.73	15990.4	9469.52	2491.04	5213.83	7943.41	NA
YNL121C	TOM70	NPTVENFIEATNLLEK	6701.24	2727.63	8228.79	6071	12424.6	14984.1	NA	NA	13646.7	NA	2473.92	NA	6914.56	NA	15434.8	4500.73	NA	12455.2	5492.84	3501.59	15559.7	NA	NA	2815.18	NA	NA	6580.13	7181.54	5914.92	NA	NA	NA	NA	NA	13868.3	NA	NA	13194.9	9913.39	NA	53398.9	7641.19	61342.6	81897.3	28144.5	43376.2	50344.1
YNL138W	SRV2	IDTVVLDALQLLK	NA	NA	NA	2282.5	NA	NA	NA	6418.39	5734.38	8636.13	NA	NA	NA	NA	4283.58	NA	NA	NA	3281.69	NA	NA	5466.93	1628.29	NA	NA	NA	NA	2999.8	4869.14	NA	3908.2	NA	NA	NA	NA	NA	NA	NA	NA	NA	7117.44	14406.9	11482.9	14685.4	15869.3	11410.8	13435.5
YPL240C	HSP82	LIEAFNEIAEDSEQFEK	17593.6	9979.5	8250.67	11355.5	16062	9772.42	9301.52	21622.3	8890.05	8917.72	11697.1	3683.47	6612.62	2463.02	9601.21	7064.27	4528.51	10478.2	18050	5525.86	11665.5	5785.67	11953.7	8794	17941.5	12806.5	6326.4	NA	6541.58	12149.5	12435.1	16845.4	14416.7	12926.6	6902.35	6660.02	8872.69	8947.45	13089	14656.5	4155.85	1877.47	7154.2	7920.97	6712.95	6882.25	4980.03
YPL042C	SSN3	APELLLGAR	78225	78028	71351.4	64811.5	75873.1	67676.8	89431.6	79930.3	73297.9	75213.6	90569.4	54773	82445.6	50628.9	66390.9	69512.7	63267	81909.1	80666	83504.9	86114.7	81257.4	89185.6	74708.9	99235.1	63119	59667.7	63536.3	61266.6	75741.1	64325.6	93114.6	86079.4	78855.3	66689	73593	72295.2	82653	72479.6	106228	110243	44021.7	75747.7	73434.1	64940.4	68359.8	51738.4
YPL028W	ERG10	TPIGSFQGSLSSK	6023.33	12158	4748.08	12600	10254.1	7573.41	19854.2	7213.78	10503.3	5905.61	16926.5	33025.4	10111	23506.3	10895.9	6850.12	20595.1	8437.5	6286.05	4853.86	10758.5	9245.63	13271.8	6893.82	8058.09	9874.84	4420.55	12809.5	6947.75	18683.1	6098.91	12315.4	8603.89	21938.2	9785.93	8224.29	32729.7	18242.4	7388.75	16595.3	4090.17	26349.6	12852.6	11680.6	12508.5	10404.8	13167.4
YLR355C	ILV5	DLTHVEPPKDLDVILVAPK	92506.9	66072.6	78276.4	70972	87207	94477.6	45012.9	107048	105508	147448	70318	44013.9	65710.9	54487.9	145603	124325	37586.6	53940.5	67180.4	87021.3	87703.6	74101	60499.4	178736	55131.7	151391	175458	162730	185789	69797.5	182650	78145.6	66718	78078.7	164364	93256.5	44359.9	84616.3	107147	78155.9	111287	32759.3	106179	109850	56499.1	99888.3	82797.1
YMR108W	ILV2	AADLINLAK	165552	156960	126604	147048	137151	144749	183292	164014	85933.9	185248	106638	231914	145815	NA	153824	153811	NA	135333	205617	193776	161266	162187	172921	162336	210249	158584	154443	161455	132441	NA	164363	178752	1440.11	163273	147057	178635	266382	169475	77797.5	163984	149120	194222	153799	157153	100933	144921	174451
YNR016C	ACC1	IGSFGPQEDEFFNK	64209.7	90125.6	73299.6	NA	74920.8	55393.6	59421.3	75745.6	56638.8	57328.9	46952.8	68660.4	51082.9	80055.5	68429.8	75701.9	47621.4	71242.1	101711	83913.6	75516	72116.2	55938.4	87953.6	75588.8	95662.9	85814.3	86585.4	72023.9	41399.1	83910.4	65352.6	56884.2	44282.9	74557.8	62885	53337.5	44029.2	80796.8	61790.5	31997.4	2466.62	88432	87920.5	77981.9	69343	72897.8
YLR153C	ACS2	IITFGELLR	2337.06	6695.87	NA	5109.5	7345	9205.45	4467.97	2585.13	4201.75	3016	8118.3	10211.3	5397.42	7083.33	8292.15	NA	9506.28	4208.03	NA	NA	5571.23	6232.83	7315.43	NA	2527.78	2241.7	2877.03	7869.32	NA	11112.8	3288.1	1556.65	NA	9338.51	2853.15	2696.99	2967.96	4714.11	NA	7256.38	NA	11387.8	6274.71	5392.03	2496.87	6944.29	7411.1
YMR062C	ECM40	LVANGVPQLEIDETR	NA	NA	NA	18098.5	12698.5	NA	3906.82	NA	NA	NA	NA	8184.93	NA	23116.8	9093.75	11520.7	11565.7	NA	11244.6	14451.4	NA	22663.4	20945.9	NA	12304.8	16031	NA	NA	14400.3	25818.7	NA	NA	11553.3	19999.5	NA	12007.4	6958.81	NA	24178.4	NA	NA	NA	29137.1	NA	NA	15319.4	NA
YOL140W	ARG8	ALGNGFPIAATIVNEK	17432.3	23251.7	25183.8	23659.5	NA	26617.3	13696.6	11742.1	26349	2740.5	18388.1	9358.64	18856.8	20749.8	20999.3	14324.3	14444.4	22981.4	15679.8	13892.3	10866.8	6149.94	10015.3	11810.7	24001.3	14853.4	10826.3	15504.2	9377.19	23728.2	6168.97	28969.8	28353.9	39192.7	13564	5137.62	7630.35	12355.2	27654.6	24378.9	23935.4	26547.8	21639	24650	9404.8	28146.4	7081.66
YLR304C	ACO1	FLGGFAIITK	7665.18	13058.8	16899.8	14277.5	14126.4	16029.8	15449.2	15992.7	19598.9	24343	10752.9	12206.8	8417.41	5727.07	15048.1	14361.1	19367.4	14923	10632.3	14043.3	10079.2	11510.6	12103.7	14586.3	12295.6	13994.2	12169.7	15074.7	10410	12536.9	13990.3	9292.57	20553.3	14441	14392.6	15808.9	15833.9	6665.99	13751.5	9099.29	19348.4	46407.3	28818.6	21159.8	29109.4	22951.3	32220.5
YCR088W	ABP1	NVASGAPVQKEEPEQEEIAPSLPSR	3685.25	16224.7	20235.7	18843	NA	17691.6	6360.66	8072.84	33178.8	10286.9	23528.4	NA	9615.66	1818.53	26240.8	17469.8	27897.8	19114.7	24822.1	21509.7	4157.26	6834.69	9023.73	9501.43	22073.2	20792.5	10605	27721.3	12855.1	24341	13630.1	22840	18618	40880.9	15825.6	12113.8	NA	NA	33935.5	13856.6	15731.5	NA	20168.4	17856.7	NA	19253	NA
YDL178W	DLD2	HGSVSAEHGLGFQK	NA	NA	14775	14837.5	4470.48	9102.63	NA	4840.43	9648.92	NA	NA	NA	NA	NA	4221.87	10158	NA	13504.4	8586.16	NA	NA	NA	NA	NA	NA	NA	2973.02	2503.35	NA	3963.52	4386.39	NA	NA	6928.4	2697.31	NA	NA	NA	NA	NA	12485.1	NA	3905.53	5646.65	NA	5070.14	NA
YFL039C	ACT1	SYELPDGQVITIGNER	52159.5	56739.6	44440.3	49232.5	57316.3	57057.7	80230.3	55873.6	53895.7	69340.2	51970.8	77958.9	52656.2	82600.5	45129.9	70665.2	81621.4	55354	61907.3	43417.6	43456.2	61189.4	60555.1	59907.5	59768.8	68822.5	43566.9	50648.8	48280.3	59638.9	50146.7	61679.5	79502.6	53474.2	56152.5	44605.1	86534.8	23293.7	53301.2	55181.7	53845.1	111948	61599.6	48817.5	95814.7	51374.3	88816.3
YGR037C	ACB1	SQEDAEKEYIALVDQLIAK	13251.3	10371.6	11063.6	7899.5	14264.3	14045.4	9780.45	9692.8	9179.32	2303.15	4364.93	NA	9852.98	NA	8913.43	16504.4	NA	11132.5	7765.12	9612.42	13949.7	6231.66	5555.27	7723.08	8400.34	6245.88	13579.4	11175.2	13459	NA	5880.16	9681.34	4461.92	NA	15815.5	5684.54	NA	10510.5	6239.99	15809.6	18447.4	NA	14334.3	10017.3	7977.82	11735.7	16022
YDR226W	ADK1	MVLIGPPGAGK	20939.9	16834.1	15294.9	13434	17812.7	14316.7	25236.5	13779.8	11171.8	9621.14	20557	29673.5	15453.8	26588.2	10960.3	13953.5	28002.3	14195.9	13330	15063.4	18258.2	12253.8	22380.5	11317.4	19163.7	9890.77	10643.3	9159.54	10062.8	16381	9292.09	20922.5	27943.5	13356.6	13613.3	8545.18	33410.8	17712.7	14265.5	24007.4	23790.5	15713.6	11969.7	11573.1	20221.1	15027.3	16142.3
YDL192W	ARF1	NAAWLVFANK	13130.2	14293.7	15974.2	13809.5	NA	14458.6	14600.9	14512.5	14766.2	12098.3	13848.1	11131	NA	11066.5	12237.9	15654.7	13957.4	13873.8	13701.3	13820.7	11762.8	7200.12	11189.4	9773.17	14289.8	10467.6	9258.41	9963.4	9774.88	15800.6	9666.78	18886.6	16760.6	16680.5	12546.9	8565.69	13886.4	15643.4	14871.4	16526.8	15101.8	13329.8	13127	NA	14780.7	13053.6	13920.9
YMR303C	ADH2	VLGIDGGPGKEELFTS	217357	119265	155470	112138	157676	127089	171438	159331	171134	258168	189515	205524	226721	334318	143639	154855	158515	109117	249702	165785	188435	245142	208741	145055	84225	140642	81689.8	99735.8	180341	215404	220456	221536	154025	48500.9	93873.8	NA	2061.98	131971	67893.5	148924	196763	330629	2268.68	102379	69290.3	5162.77	133076
YOL086C	ADH1	VVGLSTLPEIYEK	577982	345996	384442	324935	423295	340137	376306	361072	451154	583936	370932	428756	563002	677546	400640	450686	337832	288791	652474	398174	458509	319420	430586	541977	393480	522199	470271	332713	516854	487399	623830	551732	367565	306542	310912	586462	507999	302512	458822	342223	210895	598105	501876	405753	319478	411941	326869
YKL060C	FBA1	SPIILQTSNGGAAYFAGK	292966	200238	185218	211262	232123	198384	382024	268636	175365	377160	244553	437121	294356	301160	177907	194001	347102	181464	282583	206332	246645	298516	286010	254608	NA	191393	243795	203832	230819	368431	131525	348751	313992	2078.41	169325	292171	471067	336968	227785	266591	214684	308010	277538	3053.85	463412	267675	377331
YLR109W	AHP1	ETNPGTDVTVSSVESVLAHL	224453	290942	292268	316722	48647.7	203629	245492	NA	NA	7092.94	180321	253822	164492	187720	338976	267752	165590	334416	312472	209248	199408	141337	255300	1141.11	258886	168473	298455	309168	355864	179184	345389	159265	145240	188637	260377	196061	152138	171678	227579	231335	319510	100833	NA	591561	333013	193937	12789.5
YOR061W	CKA2	IPALIFEEIK	5818.23	NA	3205.67	NA	NA	2515.04	2744.06	NA	4103.62	NA	4698.1	NA	NA	NA	5102.2	2154.23	NA	NA	1920.41	3842	2681.31	2905.97	5125.99	6088.12	3500.31	6417.83	4149.7	2521.25	4000.56	6200.19	4166.28	5839.95	1887.3	3530.64	5996.79	6689.07	NA	9831.75	5983.49	4828.08	2841.26	NA	5586.47	3162.21	NA	2588.49	NA
YER178W	PDA1	LSILFEDVYVK	3019.56	2450.49	NA	2922	2714.33	2707.96	12025.6	2009.92	3591.37	6738.74	2700.13	14327.4	3386.56	14098.8	1647.9	6464.98	9118.05	2892.96	3693.7	1520.82	2578.51	3391.66	2519.96	4191.44	2520.61	8117.68	2982.49	2308.81	2055.85	3028.12	4634.52	2503.06	8355.03	NA	3791.45	3322.53	15366.2	NA	NA	4496.58	2976.13	19860.1	5885.43	3952.45	18616	7540.15	13930.4
YNL104C	LEU4	NMQIEFSSAVQDHADSLGR	NA	6463.68	NA	NA	NA	NA	33271.2	NA	NA	NA	NA	86508.2	NA	88176.5	NA	4330.9	47097.3	NA	NA	NA	NA	NA	NA	NA	NA	NA	NA	NA	NA	NA	NA	NA	29853.8	NA	NA	NA	83273.1	NA	NA	2814.57	NA	78990.3	NA	NA	46783.4	NA	36775
YMR314W	PRE5	LFQVEYALEAIK	8080.48	4570.9	1528.35	3001	3314.05	4514.99	NA	4551.72	2330.02	4916.17	6147.45	NA	6651.82	NA	NA	2237.13	NA	4787.23	4485.92	2810.3	4111.4	6859.21	5684.94	5567.2	3541.24	3997.81	4223.16	4491.44	2130.83	2774.92	NA	8920.11	NA	1990.17	NA	1697.58	NA	7099.99	4181.15	9224.24	4066.11	NA	11052.5	7602.9	NA	7229.51	NA
YHR020W	YHR020W	VIVNEWSGFVPALNKK	17160.5	19361.5	18492.3	22960	16381.9	26263.1	8909.15	25076.2	28160.7	33918.7	36122.7	6864.36	18806.5	8617.52	16422.1	21270.5	6884.32	21141.7	16835.4	26901.1	16597.3	29038.1	24556.7	31258.8	14112.3	32812	21941	30572	24341.7	23959.2	19823.5	29586.9	16045.2	19540.3	16842.3	19377.6	5162.45	22498.6	27160.4	23104.8	20209.7	NA	42042.3	38223.4	8833.1	28166.2	17792.8
YBR286W	APE3	LVEIPNLGCEEKDYASVVPPR	3537.66	NA	NA	NA	NA	NA	9273.49	1655.77	NA	3186.72	NA	NA	2896.56	NA	NA	3894.53	NA	NA	5132.02	NA	NA	3222.37	NA	3352.15	3122.25	5483.25	NA	NA	2107.62	NA	NA	3072.8	6051.1	NA	NA	NA	NA	2824.22	NA	3190.57	NA	NA	2233.91	NA	4534.82	2847.86	NA
YER090W	TRP2	LTDDSSPIPYPEQPPIK	17646.6	12698.6	17258.2	19123	19430.9	24006.1	14696.8	22188.7	9442.89	10480.9	19018.6	12122.5	20586.9	13344.2	13537.4	8960.59	14158.1	11452.4	14111.3	10190.8	12255.6	4994.67	18271.5	6791.54	18289.4	4575.75	8409.37	6426.31	10119.5	19637.3	6915.62	20742.6	14517.8	21186	8751.73	7744.03	12641.1	21414.2	18026	21374.3	19170.4	8217.91	16571.1	18635.8	13414.9	18796.3	14395.8
YOL058W	ARG1	EVSVTKPLDVFLAASNLAR	NA	29453.6	11165.7	NA	NA	6883.81	117509	NA	NA	NA	NA	209251	NA	231090	NA	23514.6	151463	11749.4	18997.8	NA	17290.2	NA	NA	11003.5	23849.4	NA	6686.93	1527.89	NA	NA	3367.64	16713.4	78184.7	2269.24	NA	NA	209931	6871.02	12950.5	6571.71	7335.04	NA	NA	4073.58	166165	24992.2	NA
YGL202W	ARO8	SLANTFLSLDTEGR	5940.88	9008.64	5915.44	4660.5	5146.34	5631.95	29117.8	4801.08	5643.43	9152.75	6256.97	38133.6	3825.18	43865.4	4504.85	8531.13	27186.8	5703.75	7383.43	3189.82	4991.23	7974.78	5722.46	5084.38	8491.41	NA	2337.14	4069.32	1798.76	8294.04	4706.84	9544.03	22852.9	7498.76	2986.41	4407.82	37259	6544.17	8650.81	4842.34	4006.95	46543.9	7045.21	4813.15	37218.3	7907.65	26753.2
YPR145W	ASN1	DPIGITTLYMGR	11306.2	24949.3	5601.85	9707.5	4914.96	13070.9	71840	3958.83	12239.9	7385.61	8696.6	84626.8	10075.5	120181	9323.01	25754	81058.9	10870.7	5206.07	5694.42	17714.5	9057.66	4721.54	16023.7	22318.7	5387.73	6416.54	8322.18	3198.93	3774.05	6593.37	11549.4	72565.8	9600.57	10026.6	12403.5	101109	9331.95	8681.23	14123.1	13479.3	23137.7	7705.46	13347.6	119418	32523.3	128086
YHR019C	DED81	IAEGSDPSLLLDQR	NA	15779.1	13579.6	13132	13783.7	11385.1	6811.56	14647.7	10953.4	12153.8	9574.81	NA	9872.05	NA	9035.77	6252.55	NA	13856	14187.3	6672.68	12859.3	17225.7	4492.55	11728.5	12307.9	3909.71	9274.19	8116.17	7340.08	6106.31	9366.22	12988.2	11315.7	10463.3	5831.72	11622.5	6148.17	NA	NA	8004.95	13722.5	NA	9064.13	12988.7	13434.1	15935.5	21232.2
YLR027C	AAT2	LSTVSPVFVCQSFAK	4049.65	3246.07	3411.43	2018	5047.46	5469.69	9730	NA	1572.19	1462.27	NA	13089.8	2529.46	17532.2	2517.06	3770.76	14667.8	8800.33	5121.08	NA	2881.86	NA	NA	2357.94	3813.41	2538.37	NA	NA	NA	NA	NA	1695.54	9947.33	1824.33	2453.86	NA	23109.3	2240.67	1403.16	6327.51	10167.3	21956.4	NA	3451.03	16127.3	5383.36	14694.3
YDR158W	HOM2	IAGVLGATGSVGQR	9650.06	15267.4	6693.67	6098.5	5902.3	6675.32	43830.8	3497.68	3974.14	6335.75	6909.48	92777.1	6738.69	85807.1	6484.67	13947.2	79609.1	6751.42	6206.53	4095.37	12391.7	6014.5	10096.4	12300.1	17628.4	6452.85	6095.66	4246.89	6132.28	5821.25	5947.05	10478.9	41204.5	5461.81	7873.84	7477.83	98008.6	9631.07	5283.75	10799	7496.48	67822.5	1413.79	2816.12	45321.7	9822.31	43773
YLL018C	DPS1	AVEESAEPAQVILGEDGKPLSK	NA	NA	110439	2296.5	NA	97071.4	10362.1	120559	112815	170947	9909	186663	168389	176688	6430.42	113574	18419.8	2740.37	8856.53	137707	9001.85	202572	193299	6159.31	158216	155219	138757	119932	148211	164210	147615	NA	5096.22	166638	116903	11178.5	18961.4	11180.5	167714	114570	NA	24205.4	111658	98377	136286	96441.6	135183
YER055C	HIS1	LGASDIMVFEISNCRV	12147.4	NA	11539.7	11136	13388.2	12745.9	3252.26	14562.4	NA	8657.75	6164.34	2574.83	8292.92	NA	NA	NA	4952.61	5313.88	13422.5	7761.11	9750.66	NA	3606.95	5914.14	8062.69	NA	NA	NA	6619.24	6225.79	10604.2	14083	5246.53	12833	NA	7739.75	3724.64	NA	16723	8468.25	NA	NA	16068.6	14219	10068.7	7051.57	5635.1
YKL016C	ATP7	ITGSTATQLSSFK	2046.97	NA	NA	NA	NA	3104.65	7131.06	NA	NA	NA	NA	NA	2433.58	NA	NA	4427.04	2430.68	NA	NA	NA	2698.94	2473.98	7890.38	4334.83	NA	6323.36	1277.63	NA	3755.52	3731.95	NA	1701.85	8552.75	NA	1473.61	1664.26	NA	3975.56	NA	8822	NA	NA	NA	NA	NA	NA	NA
YDR298C	ATP5	LFGVEGTYATALYQAAAK	5035.48	1557.02	NA	1062	NA	1792.41	5914.73	NA	NA	1857.49	NA	1914.24	NA	NA	NA	NA	NA	1834.06	NA	NA	NA	NA	NA	NA	NA	5844.13	NA	NA	3264.54	3279.61	NA	NA	1327.85	NA	NA	NA	NA	5541.85	NA	NA	NA	NA	NA	NA	NA	NA	1317.74
YNL112W	DBP2	SPIMVATDVAAR	NA	NA	6026.91	5365.5	3573.12	6005.05	5699.86	5621.67	5437.41	5721.58	8157.7	3998.27	NA	4414.85	6894.25	8198.38	NA	7372.98	5971.45	7224.6	5941.61	8278.92	NA	6517.29	5452.04	7756.27	5496.73	5295.77	7193.24	8389.63	5918.57	5711.06	7168.76	7573.18	NA	6568.58	6359.82	NA	NA	6170.03	6582.98	7010.04	6033.42	5675.91	6386	4837.91	4408.63
YOR204W	DED1	GLHEILTEANQEVPSFLK	2065.8	2336.1	2324.81	3091	4717.69	3088.61	NA	3708.58	5994.35	5156.74	3756.94	NA	4449.73	NA	1969.18	4274.49	NA	4544.33	2271.29	1889.33	2301.36	4231.11	5172.34	2277.72	2032.04	5272.03	3577.81	4113.37	4426.37	NA	5037.23	NA	NA	2796.55	4594.65	7009.53	NA	2255.9	26170.1	NA	5548.66	1965.6	15726.8	7981.13	12776.1	10549.1	8028.61
YFL037W	TUB2	SINVDLEPGTIDAVR	2481.09	1837.01	NA	1948	2362.3	1733.92	NA	2205.78	3214.76	4746.55	3340.36	NA	3236.65	NA	1436.19	3553.15	NA	3625.77	2896.51	NA	NA	2654.95	2958.62	NA	2374.81	3564.22	2388.96	2158.32	2041.57	4064.8	NA	2693.5	NA	2993.76	3630.53	2723.06	NA	NA	1784.5	3071.32	NA	3240.91	3821.14	3151.08	2803.27	5114.08	NA
YHR208W	BAT1	ICLPTFESEELIK	14690.1	37756	7380.75	6859.5	8749.13	6721.55	86790.3	NA	7184.28	2515.45	4621.33	147253	5268.69	134545	7158.09	40879.6	120588	7990.97	3607.72	4543.74	20809	11859.7	9897.19	19384.4	41082.9	7052.02	10619.9	8370.36	3605.1	3647.17	5800.61	4506.35	72605.1	5257.16	7103.38	18168	147989	6193.38	NA	19928.5	7590.24	171494	2827.58	NA	144463	40471	137104
YBR109C	CMD1	EVSDGSGEINIQQFAALLSK	10116.8	9431.47	9261.75	NA	12456.7	10281.8	NA	7838.51	11222.6	5763.71	7092.7	NA	7447.47	3867.58	8775.13	11850	7984.83	11646.8	11808.7	5073.09	NA	4553.35	6356.45	2675.8	8652.05	8201	7572.48	5500.4	6699.14	4453.42	6380.49	7670.68	10286.6	8488	10463.7	4652.65	2672.96	7233.23	7808.39	11094	2426.13	NA	4868.55	5278.31	8149.06	7408.74	4623.97
YJL130C	URA2	VFAIANAFAK	11945.9	27542.6	16217.4	24861	7669.33	19924.1	105699	16989.3	20832.5	17749	31131.8	110358	26052.6	134304	20460.9	54161.3	117308	28885.2	11793.3	26427.4	20679.5	15183.7	20312.5	29439.4	47603.7	21541.9	43358.3	27498.8	12573.4	26702.9	22767.6	15511.8	81789.7	32187.2	26594.1	17893.6	118393	29545.3	11660.6	26527.6	50605.8	152673	14513.6	29450.8	117269	47530.8	57178.6
YMR307W	GAS1	ALNDADIYVIADLAAPATSINR	18106.6	11468.2	13636.3	15303.5	18210.7	22022.6	5802.63	16497.2	18196.3	13543.4	9881.36	NA	12541.4	NA	19763.6	19702.4	NA	15917.6	17972.5	7958.85	9264.89	5819.53	11499.5	8039.94	10209.8	11612.4	13893.9	10702.1	13600.5	7086.66	11801.9	13980.4	9635.48	12182.9	14864.3	11084.9	NA	9480.43	16065.8	16222.2	4928.97	NA	8074.81	9168.55	NA	11559.9	NA
YGR282C	BGL2	ESTVAGFLVGSEALYR	22583.8	22040.1	32022.8	16884.5	22305.9	26246.6	16977.5	18127.7	33754.3	18046.6	19218.7	14712.2	40337.3	11553.2	32232.4	18791.6	15197.6	30577.4	14852.8	22738.6	21126.4	22503.5	15114.8	24640.8	15775.5	19879.2	19686.3	23637.3	18145.1	15093.4	15031.7	22306.6	14711.1	36482.3	19206.7	17643.7	12737	44107.5	39166.8	24694.4	32677.8	6585.33	30349.9	31084	18778.1	31770.6	16717
YKL096W	CWP1	SGSDLQYLSVYSDNGTLK	94275.5	95990.6	104100	94395	104370	105387	18768.7	83455.9	89695.4	28397.3	28301.2	NA	18759.3	12927.2	48072	74982.8	19940	90982	57771.2	48886.7	119788	19157.9	10786.6	127427	42440.7	74255.8	114282	137321	130184	15442.2	106894	65816.1	29885.7	20936.2	145227	7377.42	14451.9	66188.9	49293.1	40940.5	NA	NA	116329	105888	NA	92115.9	43793.5
YGL148W	ARO2	GFEIGSGFQGVSVPGSK	NA	NA	NA	NA	NA	NA	8724.8	NA	NA	NA	NA	11366.4	NA	10587.1	NA	1823.21	9301.79	1133.91	NA	NA	NA	NA	NA	NA	NA	NA	NA	NA	NA	NA	NA	1995.92	5870.23	NA	NA	1357.47	10854.3	NA	NA	NA	NA	14951.1	NA	NA	10912.1	NA	9619.69
YNR001C	CIT1	ANQEVLEWLFK	NA	NA	NA	NA	NA	1744.77	2254.54	NA	2383.97	3713.87	NA	NA	NA	NA	NA	2774.24	NA	NA	1686.32	NA	NA	NA	NA	NA	NA	2061.26	NA	NA	NA	NA	NA	NA	NA	NA	NA	NA	NA	NA	NA	2809.44	NA	NA	5917.66	2608.87	8302.49	8167.02	4236.07
YNL255C	GIS2	LCYNCNETGHISK	2364.55	4277.82	4108.93	3127	3459.41	4438.58	5619.52	1807.87	4786.44	1551.51	3556.84	5227.13	5572.23	5094.2	5109.65	5775.31	5582.46	4788.77	4249.35	2595.48	5477.51	3926.97	3313.41	1450.96	3646.63	3994.09	NA	1835.3	3849.69	3150.45	1774.89	4571.58	4654.64	3170.78	3633.76	2165.03	3612.51	3405.06	3080.13	4525.68	NA	3524.84	1411.67	NA	NA	1868.99	NA
YDR155C	CPR1	VIPDFMLQGGDFTAGNGTGGK	NA	NA	NA	NA	94687.5	38235.9	NA	56188.9	74074.7	73974.2	108793	108060	115978	89708.3	53653.5	NA	100925	83019.6	96799.1	NA	36493.2	106146	NA	65632.1	NA	84628	NA	45107.6	NA	119196	NA	NA	NA	92386.2	NA	28904.7	85826.7	4812.54	53207.8	NA	5592.28	21664.8	NA	NA	33041.9	59625.4	54505.1
YLR216C	CPR6	IVFELYNDIVPK	2805.8	3639.31	1502.3	2314	1943.54	3723.5	2656.86	2603.7	4818.81	2430.65	3009.24	2303.41	1506.02	NA	NA	3746	2407.4	2605.65	3512.3	NA	3470.93	NA	1979.22	4984.1	3504.92	4965.81	1346.58	2714.41	NA	2324.86	2108.45	3246.4	2541.56	2659.41	4760.18	2231.26	3069.89	3704.17	NA	2547.55	3652.98	3908.14	4336.79	1988.38	5942.61	2998.22	4017.87
YML078W	CPR3	IEFELYDNVVPK	NA	NA	NA	NA	1745.77	2133.91	3673.27	NA	NA	NA	NA	NA	2982.38	4043.68	NA	NA	NA	NA	NA	NA	NA	NA	3152.84	NA	NA	5385.07	NA	NA	NA	NA	NA	2306.31	NA	NA	NA	1188.27	4837.47	1867.04	NA	3985.36	NA	6271.83	2205.92	3279.22	3635.71	NA	10811.5
YGR155W	CYS4	TPTAAAWDSPESHIGVAK	69037	81722.5	75038.9	70632.5	82898.7	73807.3	74208.5	66903	65199	60739.5	83542.8	62592.9	86760.7	59205.4	75862.8	36846.4	75487.7	3796.21	69478.1	83443.7	86565.7	45638.5	85516.8	54423	83010.4	57277	1927.48	59170.6	63846.9	80644	56206.3	NA	89799.2	84105.6	75688.4	70545.3	20797.3	2371.19	68624.2	2613.73	96522.7	18695.4	68528.6	1743.64	NA	77927.9	13753.6
YAL012W	CYS3	IAEFLAADKENVVAVNYPGLK	45045	49169.1	47921	49866.5	32869.6	40770.3	28925.3	47073.1	45442.9	75350.6	40559.2	29501.2	30212.1	32786.1	53641.2	51241.5	54037.6	39513.4	49936	54972.2	27035.8	64051.6	56948.7	49922.3	39544	40583.6	56094	48149.6	64759.2	71562.5	73150.8	32116.3	45025.3	43872.6	NA	54667.1	33391	NA	56272.7	25579.9	NA	71711.7	37225.1	30362.1	31208.1	29495.8	31202.7
YOR335C	ALA1	LVSVLQDVR	2976.8	2819.25	2729.56	2633.5	1838.72	1923.07	6157	3426.06	4831.65	2562.57	3353.67	6728.65	2944.24	6441.89	2285.14	2237.7	7945.18	2835.8	3468.56	1674.5	2161.78	2513.68	2123.23	2844.26	3095.64	1563.99	1991.48	3397.14	1206.01	3764.95	3098.72	4555.8	4545.5	3885.73	3137.64	4455.68	6854.48	3013.48	4381	2958.92	2657.76	6749.77	3790.61	4229.74	6740.81	2361.87	4168.09
YBL076C	ILS1	VLLPWWNSFK	58677.5	30715.9	38337.3	38447.5	49711.2	45010.3	31047.2	46898.4	36179.3	34425.9	43688.7	25349.3	46965.8	25479.5	45248.6	27546.1	25302.9	40711.7	34943	32013.3	48009.6	39666.6	49111.3	39444.7	43290.9	45866.8	55669.9	38939.6	52117.9	41880.4	35286.8	46045.1	35565.7	42260.9	54852.7	49053.5	22334	54443.9	42067	50268	43395.1	17198.3	37649.1	38003.4	26534.9	41025.1	26856.3
YPL061W	ALD6	GDVTIAINCLR	35849.4	34141.8	27159.6	24362.5	35456.8	33261.5	12395.6	17624.6	28775.7	27597.4	22961.8	8703	30231.7	13816.3	32484	25845	10401.7	22806.3	28649.5	18636	33555.9	21199.3	37032.9	28769.5	29737.8	26845.8	21188.4	31072.6	17288.1	36022.2	21663	27338	13824.2	30084.4	26542.5	32757.4	16467.7	30653.7	27272.2	31235.3	18243.3	19353.8	27380.7	21390.1	7286.03	26284.3	5761.07
YDR035W	ARO3	ELASGLSFPIGFK	NA	NA	NA	NA	NA	NA	14047.3	NA	NA	NA	NA	22314	NA	21387.6	NA	NA	14731.3	NA	NA	NA	NA	NA	NA	NA	NA	NA	NA	NA	NA	NA	NA	NA	12325.5	NA	NA	NA	25103.5	NA	NA	NA	NA	30513.9	NA	NA	20947.1	2672.51	17441.5
YNL071W	LAT1	TVIENPLEMLL	NA	NA	NA	2769.5	NA	1560.81	2785.16	1931.22	NA	3899.56	NA	4401.08	NA	2908.79	1902.16	2535.91	2775.5	1811.61	3028.22	NA	2180.42	2798.56	NA	NA	NA	NA	NA	2722.21	NA	NA	2150.93	NA	NA	NA	2050.88	NA	2395.35	3725.39	NA	2783.19	NA	6895.88	5091.6	NA	10821.3	5648.32	4236.54
YLR420W	URA4	PYFFFGSDSAPHPVQNK	56041.2	65824.5	65287	61097.5	69704.3	65665.5	54607.1	75952.9	65370.6	65770.4	50201.1	47427.8	44508.4	71625.1	63633.4	82245.7	44065	71373.7	93595.5	92229.9	71680.7	66468.3	51121.9	78103.2	67964	86202	86140.6	84635	75924.9	37712.1	97657.1	52935.1	68291	51664.2	70386.9	63408	50321.6	31737	65089.3	51562.1	56832.3	5624.71	69454.8	73752.2	71906.4	NA	55075.1
YKL216W	URA1	NGFGGIGGEYVKPTALANVR	NA	NA	8462.68	8656.5	3764.95	NA	NA	NA	1602.5	NA	NA	NA	NA	4295.61	NA	NA	5039.44	17526.7	NA	NA	NA	NA	NA	NA	NA	20706.6	13235.1	NA	9779.79	NA	NA	11682	NA	3919.75	3517.11	NA	NA	NA	NA	5913.28	NA	14590.3	9779.51	14393.3	5491.46	NA	11394.3
YJR016C	ILV3	FSGGSHGFLIGHIVPEAAEGGPIGLVR	180425	133328	149329	135909	146997	165715	NA	147782	140748	145532	131098	82948.1	149850	NA	164590	108111	84963.2	124171	122505	125277	144037	124264	135265	161314	113146	98609.9	119482	105755	129023	120890	118316	154847	NA	143184	118872	139376	NA	170881	135184	139469	149158	109911	148341	159598	NA	NA	NA
YEL071W	DLD3	VLDSEDLAYFR	NA	5839.4	5426.82	NA	2021.65	4360.75	19029.7	NA	2034.08	NA	NA	26990.2	3371.73	23270.3	5148.48	NA	30933.8	NA	NA	1306.55	5747.6	NA	NA	2816.19	9043.93	NA	1699.9	3857.81	NA	NA	2542.34	1441.97	11419.3	4410.91	3896.11	2731.6	35732.4	1509.73	5900.09	NA	NA	36787.5	1561.36	3014.3	25816.2	3722.9	20801.9
YIL053W	RHR2	IVGIATTFDLDFLK	21376.6	21374.3	28533.8	18788.5	14968.3	11750.7	41044.4	15765.9	15844.2	13265.2	12331.7	42864.3	14520.4	42507.3	39420.3	32181	24853	21903.1	19336.3	21011.2	28100.6	20449.2	9675.92	17126.7	23137.8	21225.1	35730.8	30534.4	31976.3	7388.22	40430.7	9374.11	27314.8	15751.8	35741.4	38326.2	23950.5	17181.9	20962.9	26284	41950.1	3718.85	24991.6	23507.1	45164.6	36518.1	53093.2
YER176W	ECM32	ILFAMTRITNPK	7734.91	4829.27	1399.16	NA	3846.04	2194.76	5248.33	1310.47	1808.02	1574.79	3016.92	NA	10159.2	NA	4819.22	1659.13	NA	7335.22	6399.86	1853.52	15850.5	4039.63	2272.21	10387.4	6524.85	5479.54	4619.29	4138.61	1598.79	NA	1883.82	8727.57	1456.33	2704.06	6115.29	1301.07	NA	11213.7	2477.95	12447.3	13628.7	NA	8418.3	7151.74	1146.6	5600.07	3374.69
YHR124W	NDT80	EINLVQHTAK	36380.2	53487.9	53928.6	50201.5	28528.1	48543.7	26959.1	31504.8	78480.9	43329.8	35446.1	22037	33833.3	21262.8	70535.6	77415.1	58070.3	95374.2	68198.3	62057.5	33035.4	36475.8	27735.5	38323.1	36174.2	104568	39659.2	57769.4	32589.6	43043.4	41155.7	40004.8	58840.1	61581.1	53535.8	37768.6	15128.8	25374.5	97240.8	40320.9	68787.4	26008.9	64995.4	62733.3	36351.1	67529.1	35828.1
YPR183W	DPM1	VAIGEVPFTFGVR	3950.92	4978.37	4270.93	NA	5495.4	5664.5	9571.19	2690.36	4416.51	5934.99	4600.35	10282.6	7357.42	8937.32	7081.49	6615.24	9221.88	7391.87	5290.56	2209.9	6300.89	NA	7766.23	5694.54	7750.11	9481.06	6229.06	4774.08	4394.23	6392.51	3515.89	6055.11	7503.69	3288.78	3023.75	2406.44	10733.8	7655.26	4110.34	8447.14	3699.61	13805.4	3335.18	2528.12	11034.1	6553.95	9345.88
YLR249W	YEF3	LVEDPQVIAPFLGK	69694.1	57741.8	63203.4	58034	56542.5	55434.6	74800.1	53443.7	49761.8	53741.9	60780	46543.4	89307.7	47553.8	49105	43591.1	57286.9	66871.3	54495	55282.3	53702.7	62820.4	63680.9	62542.2	60093.7	47711.5	45023.9	46908	43567.4	66942.4	47067.5	78068.8	56995.2	70124.4	38377.4	47043.6	50201.1	82716.6	70869.3	61821.3	64742.4	78354.4	73149.1	66060.3	75333.4	50202.9	50332.7
YGR204W	ADE3	YILVSGITPTPLGEGK	NA	NA	NA	NA	NA	NA	5709.21	1291.9	NA	NA	NA	14792.1	NA	14363.5	NA	NA	9386.73	NA	NA	NA	NA	NA	NA	NA	NA	3857.7	NA	NA	NA	NA	NA	1943.84	1715.79	NA	NA	NA	13447.5	NA	NA	NA	NA	NA	NA	NA	11624.5	NA	11966.1
YDR086C	SSS1	LVEAPVEFVR	11129	12043.6	11461	11111.5	10054.4	8467.73	11116.4	8834.63	9308.79	11495.3	9122.91	5802.83	11182.1	5993.68	9371.42	12164.3	9539	11029.4	10538.4	10378.1	10611.3	11520	9246.09	13043.1	10515.3	13567	10280.5	10342.8	11111.7	11663.5	9625.65	12251.7	10745	10071.5	12200.1	9378.37	9857.82	10953.2	9527.32	9528.92	12862.1	8317.88	10062.4	8516.74	9400.69	8965.37	8841.03
YGR254W	ENO1	AAQDSFAAGWGVMVSHR	18684.8	6304.34	NA	5796	9376.54	NA	17184.9	NA	4535.2	14455.3	16080.5	11963.2	9087.52	13163.2	NA	14826.3	NA	1763.64	15759.4	14936.1	14523.7	4287.15	11540.9	2597.09	34600.5	13954.9	11397.3	9023.26	NA	22317.7	8000.36	14861.1	24624.2	9319.37	6207.5	NA	11663.2	4238.78	12314.2	15632.2	12883.7	22855.5	9665.44	14574.2	17355.2	16333.2	24881.1
YHR174W	ENO2	TAGIQIVADDLTVTNPAR	475617	507985	536350	538040	614421	597755	349223	649385	612830	596367	549274	396732	535122	415565	633152	400629	449156	527357	565969	498771	517964	517807	473828	700998	541267	440137	640600	690990	511700	591537	665630	530272	404795	694522	609758	664473	448246	553389	711641	378725	515027	515228	557535	550234	510321	439632	561238
YBR102C	EXO84	GPSNSLNLSTADLSLNDSSYNK	8979.78	13440.1	15739.2	14104.5	7849.3	9548.84	4959.36	10892.3	3989.04	6274.22	5870.07	NA	5754.99	NA	7555.43	7199.56	NA	12233.2	10845	4417.61	NA	9263.72	8885.78	NA	8190.59	NA	1294.3	NA	2650.82	7107.71	NA	7906.36	7299.12	6147	NA	NA	NA	3314.23	5111.17	8938.96	20944.7	NA	13049.4	10978.9	6600.62	11995	6291.59
YJR121W	ATP2	VLDTGGPISVPVGR	25599.3	21578	20409.7	15396	23804	28639.9	50327.2	16340.2	20061.8	22922.3	27416.8	40164.9	24856.5	43860.5	12533.2	37909.1	33479.6	19657.7	19835.7	20550.7	29669.2	25768.4	49693.4	37077.2	8444.34	46332.2	20517.3	16589.3	33319.8	29986.5	13514.9	33299.4	48869.7	16944.1	28467.9	25130.5	32447.3	38288.8	12127.5	54069.7	22795.8	46355.2	20901.1	18416.6	31235	15191.5	22626.4
YPL078C	ATP4	VLQQSISEIEQLLSK	6534.31	4041.65	3966.72	2639	9478.88	22682.5	12548.8	4895.26	5879.26	4459.97	3335.24	2864.23	3962.91	3390.02	1780.88	11318.6	3977.31	4391.23	3891.51	NA	5000.81	3552.19	8686.04	3719.15	2390.67	4744.51	2543.99	1242.5	2857.92	4874.46	NA	2246.86	10139.4	1334.76	3930.7	NA	3173.62	2133.53	NA	2942.38	6235.54	17394.1	4890.18	10040.8	24718	27429.9	30658.4
YJL167W	ERG20	FLNVFPK	18295	13091.8	14991.7	15714.5	14220.3	14540.7	12936.2	13990.7	15845.7	19135.3	12105	11283.4	13313.7	15238.6	14335.3	19121.5	17919.6	12743	13316.6	15903.9	12759.5	13206.5	12027	11780.7	14014	10961.2	10252.6	8626.84	10130.6	16761.1	7971.88	20565.3	17555.8	15856.5	10460.5	7258.21	16202	11001.6	12070.8	11731.3	16917.7	23382.6	12466.7	13520.2	20018.3	13759.8	20655.5
YOR176W	HEM15	YAKPLTAETYK	22047.9	24801.9	35020.2	32011	31364.6	40263.2	29244.2	30868.1	41979	30626.7	25725.4	22139.9	29260.7	18132.1	38007.5	36917.2	25383.4	16669.3	27530.3	37331	16990.8	33826.1	26838.3	18242.3	26342.9	30900.9	22514.2	22670.1	30703.8	34105.3	24080.2	20129.7	30608.5	37960	30882.1	17886.8	17677	19354.6	24315.3	30727.5	28970.6	21112.9	18632.9	16251.9	12649.6	22598.9	9612.09
YCR004C	YCP4	TLLEYDAFLFGVPTR	NA	8501.58	10223.9	6997	7845.34	NA	NA	7935.78	11936.8	6249.28	NA	NA	NA	NA	9268.76	8679.65	NA	7563.33	10696.4	NA	8584.62	NA	NA	NA	NA	5186.06	6072.23	8468.54	9921.28	NA	11854.8	NA	NA	NA	NA	3296.47	NA	NA	NA	NA	13402.6	NA	30918.1	30071.7	NA	33129.9	23129.4
YGL105W	ARC1	VASIANAQVR	4598.29	NA	4537.11	6681.5	NA	13742.6	11443.3	7910.13	17460.5	9631.67	10037.5	4821.23	14795.4	4164.14	18636.5	11543.7	3075.01	5381.75	8009.15	11880.2	4944.87	11437.1	7654.77	7337.03	7992.09	15804.4	10236.8	9375.18	10757.7	7777.41	11249.1	19061.8	NA	8030.86	4747.27	7370.58	NA	NA	12758.5	12114.1	13675.9	NA	21186.1	3384.28	NA	13985.5	2206.22
YHR193C	EGD2	SAGGNYVVFGEAK	22254.5	27849.9	24217	23043	24754.3	21985.4	28917.8	20950.7	24848.8	23691.7	27406.6	24680.6	27112.1	23159.6	26115.8	32234.5	33903.7	28689.2	25009	26583.9	29041.9	24349.9	30150.6	27843.5	29662.6	26912.6	23327.2	21691	26232.8	26611.3	21413.1	29475.9	33216.8	26253.9	29676.9	28870.5	28117.6	29129.8	22168.9	28828.7	24004.1	22703.5	18337.3	17907	24531.7	21069.8	21165.6
YGR019W	UGA1	YNVVYIIDEVQTGVGATGK	1237.75	NA	NA	NA	NA	NA	NA	NA	8111.15	2160.14	NA	NA	NA	NA	4867.63	6984.25	NA	6299.29	8796.89	NA	NA	NA	NA	NA	NA	6777.64	NA	NA	NA	NA	NA	NA	NA	1680.8	NA	NA	NA	NA	6372.18	NA	NA	NA	2309.82	1655.06	NA	NA	NA
YOR323C	PRO2	TNYPAGCNAMETLLINPK	NA	NA	NA	NA	NA	1227.33	2977.61	1885.68	NA	NA	NA	6093.46	NA	7282.05	NA	NA	3875.38	1046.14	NA	NA	NA	NA	NA	NA	NA	NA	NA	NA	NA	NA	NA	1612.94	3369.21	1564.92	NA	NA	9047.17	NA	1144.03	NA	NA	3791.02	NA	NA	4543.04	NA	2741.01
YMR116C	ASC1	GQCLATLLGHNDWVSQVR	NA	33221.6	40744.9	NA	48158.8	56099.2	33986.8	50660.1	24178.3	NA	43232.2	29063.7	NA	25420.8	17630.6	21777.7	26784.7	19470.9	32094.7	40864	38024.1	16481.9	46062.2	17966	NA	22953.6	30011	24170	NA	41712	NA	45246	39539.2	47332.5	28283.5	19584.8	26206.8	60331.1	38630.7	47925.9	23116.7	45868.4	40163.3	44818.5	40494.2	44821.2	52390.2
YNL272C	SEC2	EESAIDQTEFENAESNVK	3910.71	NA	2798.32	3999	2185.3	2387.21	NA	3125.41	3704.92	NA	NA	NA	NA	2434.28	5654.87	3723.55	2073.29	4366.74	3488.44	NA	2366.87	NA	NA	5498.51	2133.85	2931.09	3792.33	6096.42	2844.09	NA	5604	3031.24	2191.67	3127.19	2324.3	2174.86	1454	2162.9	5384.99	NA	1982.92	NA	2051.99	1230.69	2642.07	NA	1831.15
YLR150W	STM1	EAQADAAAEIAEDAAEAEDAGKPK	37111.1	49261.8	53842.7	27946	9827.94	53554.9	44422.4	63981.4	40184.3	66930.6	46853.1	45428.6	38007.6	46459.9	56407.8	70930	60808.6	52166.6	47926.7	40223.9	34589.9	50530.5	60370.8	46741.6	47018.9	54395.8	58575.8	46429	57909.7	57254.9	52370.4	34100.6	55461.6	58113.7	24559.4	59970.9	45189.1	NA	41911.7	33870.7	21523.3	74301.3	3332.21	38777.9	51810.9	35529.3	46399.5
YBR196C	PGI1	VVDPETTLFLIASK	39687.8	28575	29203.7	32715	28714.5	23756.1	36189	34646.6	19738.7	51279.1	30734.7	43255.3	31794.4	44019.5	25753	21852	30894.2	29900.7	49858.5	30483.7	28143.4	39964.9	28644.3	25294.5	35153.5	25732.9	36275.2	28414.6	28332.9	33869.8	37386.7	34982.3	25935.8	29486.9	25790	29162.7	38837.7	31879.5	31542	26650.3	34509.3	52017.2	31584.7	33900.5	45194.7	26454.5	38200.7
YBR229C	ROT2	NNLQHNITLK	3003.27	NA	5420.57	4589	NA	3035.31	6867.61	4018.51	2341.84	17415.3	11366.5	12864.3	11684.8	15544.3	10536.9	10078	28504.4	3638.01	1815.04	4783.9	NA	14140.5	18622.4	6435.06	4994.16	11588	8040.72	4897.96	14674.4	21859.1	10177.5	NA	17728.6	14136.9	5811.9	29205	14157.5	8530.32	5632.05	NA	NA	34416.1	5783.23	NA	10025.4	NA	8739.3
YDL171C	GLT1	VIVVGGGDTGNDCLGTSVR	14322.1	3806.05	8391.84	6628	8005.04	4300.38	16673	4808.16	7242.85	42983.3	14816.9	13945	14375.3	13024.4	8338.42	8586.39	16488.1	8837.58	10263	5945.04	4207.15	21898.7	5666.18	16748.2	8658.7	7851.79	17688.5	9243.04	15471.1	25629.8	17456.5	NA	14797.2	13945.6	2360.26	20193.7	22142.8	3660.12	9723.5	7256.95	NA	25214.5	5382.93	5600.51	4912.45	2223.14	15338.5
YBR248C	HIS7	VSIGTDAVYAAEK	48154.1	36376	39058.2	36256.5	43412.9	33146.4	49707.5	39492.8	31612.3	43318.7	58222.7	41652.2	58067.4	36657.3	40433.1	35075.5	52302.2	38574	36696.5	40902.5	51290.5	51207	33602	54074.6	50359.1	42503.7	46958.1	39517.7	51383.3	50989.3	46967.1	47613.4	52852.6	44392.5	45204.6	60215.8	44229.8	55018.2	30224.3	55821.3	44554.7	39540.4	39096.4	39285.5	33878.5	40638.2	34605.9
YPR035W	GLN1	IIAEYVWIDGTGNLR	1946.7	1518.32	NA	2505.5	2059.23	NA	3118.36	2008.15	1600.96	2493.84	3324.49	2994.99	NA	4581.17	2012.8	NA	1373.59	1574.31	3474.03	NA	2532.15	NA	NA	NA	1325.02	1593.18	NA	NA	NA	NA	1849.47	4668.91	2016.41	3936.76	NA	NA	4961.59	NA	1707.4	1519.4	NA	3595.23	4698.93	3008.12	5022.5	3396.32	1899.6
YKL104C	GFA1	MCGIFGYCNYLVER	177825	122936	134616	117566	226499	NA	97184.8	163948	151138	108368	98091.5	72042	159352	69733.2	173853	113162	66719.5	148843	117845	126038	163425	103624	90149.5	208328	125062	144069	NA	140898	202832	62082.7	168129	124212	72727.3	124201	85189.8	144528	41079.5	150930	139371	156511	NA	14282.7	210670	113852	144946	294845	160256
YDR513W	GRX2	HIGGNSDLETLKK	213544	178827	174525	163299	220963	193040	226855	212220	170335	243828	250416	245703	255129	231056	177573	171964	213645	199633	NA	302290	207572	321351	228159	251131	226381	225541	NA	243805	300366	260240	338833	259275	204243	221160	290136	228226	203143	192357	194604	243299	179449	219503	175366	144207	115280	142913	113261
YPL091W	GLR1	VELTPVAIAAGR	NA	3652.97	NA	5659	2609.51	1933.92	NA	5328.1	NA	8102.34	4552.76	NA	NA	6694.43	NA	5561.73	NA	7463.82	4261.27	3585.86	NA	5176.8	5387.53	NA	NA	7080.15	4752.69	NA	4078.67	5994.22	4595.65	1649.77	NA	4034.57	NA	3292.62	NA	NA	NA	NA	NA	NA	NA	4695.31	NA	2794.87	NA
YJR009C	TDH2	PFISNDYSAYMFK	NA	NA	4427.72	NA	2612.48	2738.15	NA	5831.69	3427.99	NA	2685.29	NA	NA	NA	16004.5	NA	NA	NA	3979.48	NA	NA	NA	NA	NA	5077.04	NA	7121.82	NA	1963.9	NA	5860.72	NA	NA	6444.67	NA	4818.01	1832.94	NA	NA	NA	7709.06	NA	8499.72	11534.7	NA	4623.79	3171.23
YJL052W	TDH1	IDVAVDSTGVFK	NA	NA	NA	NA	NA	NA	16097.5	3285.46	NA	18540.5	NA	5136.65	NA	3078.78	NA	22807	4165.45	NA	2553.58	14521.9	NA	NA	12951.3	NA	26680.6	9595.16	7092.08	NA	NA	9238.55	7144.32	NA	13362.7	NA	3165.77	NA	17946.8	NA	3737.39	NA	NA	18960.4	NA	1288.37	28177.9	7503.53	19684.3
YGR192C	TDH3	VINDAFGIEEGLMTTVHSLTATQK	163836	1.21163e+06	595575	739558	1.16376e+06	1.12844e+06	508836	940037	991606	559302	283509	466841	NA	NA	520501	305232	114781	940524	578645	1.01695e+06	1.12842e+06	822465	566360	785871	907485	249826	1.06013e+06	710811	874132	427617	722139	212673	464961	687071	887307	NA	456731	994789	930602	1.13008e+06	700799	161746	NA	590800	477621	569205	431577
YDL022W	GPD1	NLPDMIEELDLHED	7311.98	3558.5	NA	NA	8554.33	2544.28	11615.8	7330.95	NA	5946.63	5351.64	NA	4081.04	6983.04	NA	13091.7	2419.36	5631.29	8116.5	NA	NA	NA	9850.84	NA	9582.63	14503.1	NA	NA	2432.11	7257.93	NA	3075.43	11229.7	NA	5662.97	3391.32	NA	2553.93	NA	13974.7	NA	6180.74	NA	5500.8	10650	19766.6	12718.7
YGL234W	ADE5,7	TAVDTVYEAVK	NA	NA	22233.4	NA	NA	19651.4	NA	29035.1	24644.3	45953.3	NA	52003	49174.3	48275.9	NA	26928.4	NA	NA	NA	32349.3	NA	46584.2	46127.8	NA	37173.3	32151.8	31492.8	23882.8	33769.7	50239.3	30995.8	NA	NA	39796.6	19124.6	NA	NA	NA	30229	29319.9	NA	4774.11	27420.1	24723.3	40287.3	25609.2	40314.2
YDR408C	ADE8	VHDAEHIAIVEATYK	NA	NA	6065.46	2038	NA	3740.95	NA	3378.31	4602.5	NA	4375.17	2242.06	NA	2018.48	5367.1	NA	2915.81	6133.44	NA	NA	4487.83	NA	NA	NA	4994.67	3735.11	3932.93	4150.54	3252.04	NA	NA	NA	NA	NA	NA	NA	5203.82	2270.04	NA	NA	6878.29	NA	2338.65	NA	NA	1853.48	NA
YDR019C	GCV1	AVEFAEQLLANPVMKPIGLAAR	10630.8	13432.1	13781.2	13686	19594.6	19669.4	NA	23308.2	32004.8	30700.4	10583	NA	1653.82	NA	44482.6	31257.6	NA	10396.6	12400.1	11789.3	15985	6507.78	1696.16	35780.2	6359.6	28304.1	40714.2	45007.6	30772.6	6963.19	44278.8	8577.11	5325.74	15476.5	39763.9	47496	NA	8246.97	22762.1	3856.98	3228.32	NA	6897.64	NA	9266.9	12749.9	10943.6
YPR160W	GPH1	AESITAVLYPNDNFAQGK	27958.7	16616.8	24697.8	19280	16350.7	12859.6	13026.5	11416.2	18617.6	15302.8	10767.2	15565.5	21228.4	26445.7	21692.3	20407	9834.74	11711.1	33306.4	16724.1	25155.2	19438.7	11786.5	46240.7	12091.5	38510.1	41617.3	29826	47904	11974.2	57145.1	20645.8	6946.73	10726.4	19062.4	22066	9720.51	15090.3	22334.6	13817.2	34216.5	6947.93	31613.1	22885.7	7722.57	21485.2	5988.3
YBR121C	GRS1	YDIGNPVTGETLESPR	8731.42	9048.47	9740.47	7428.5	15707.5	13985.5	11338.7	5539.44	3811.78	NA	13312.8	7290.09	5425.49	NA	10566.1	3783.42	11392.7	5810.92	5542.04	9003.21	NA	7943.25	13803.8	20356.1	5475.06	14608.7	17955.8	16450.7	18424.1	2852.3	14668.8	6826.86	6382.28	5101.41	17824.4	11534.4	5481.43	12991	7254.47	1326.55	20471.4	NA	8880.51	7103.95	NA	5640.14	NA
YMR217W	GUA1	IVNEVDGVAR	32156	29494.6	38080.5	37549.5	36491.1	37026.1	27174	40173.6	35428.7	45300.4	41835.6	29645.6	31885	26053.7	38905.4	33548.2	30100.7	NA	34209.5	43935.4	33105.4	NA	39760.9	32185.3	35459.5	29109.2	38145	33208	47578.2	43214.7	38139.2	34034.4	28408.1	36447.2	34199.6	42306.7	20178.5	22282.2	27107.5	33429.7	34060.6	27278.3	27909.5	21681.8	13610.8	22593.3	12286.1
YMR235C	RNA1	DSLFELNLNDCLLK	40888.9	32823.8	42092.5	44382	46430.8	34224.7	14248.4	29234	18309.8	11284.1	17633.2	14286.5	20175.3	10788.9	29410.5	15441.1	12563.7	32853.9	41775.8	19861.6	20153.4	13313.3	12979.4	14057.4	21896.7	12358	31684.3	33867.8	NA	10840.2	23962.7	34020.7	14585.1	31162.9	31464.9	NA	7651.93	33298.4	32418.5	29513.9	20804.8	NA	25328.7	27360.2	10719	22764.3	15356
YPL218W	SAR1	LATLQPTWHPTSEELAIGNIK	6341.42	NA	2831.14	6020	6532.18	5235.26	8040.35	5574.81	4946.23	8404.43	5063	5520.25	9473.69	7112.68	3269.2	NA	5383.62	6064.55	6309.91	6339.43	7896.78	NA	7014.16	9204.62	8310.82	9567.03	5563.43	NA	NA	8231.45	7792.9	8148.36	6928.64	4044.67	NA	5087.2	7152.48	7107.6	6305.04	7686.58	4302.25	NA	6978.64	5971.73	8996.11	6322.59	6875.83
YDR454C	GUK1	FLFIAPPSVEDLKK	7802.6	2808.44	4361.05	NA	4639.08	3984.34	2699.84	4998.71	5118.34	4631.81	5460.13	2530.22	3712.35	1391.72	4285.7	7019.37	38229	5984.94	4754.3	4962.92	6136.12	6012.75	3699.1	7253.3	5166.06	6655.58	4866.71	4860.34	4833.88	3544.18	4358.37	7017.3	5198.51	3912.31	5629.77	1672.37	5389.09	3179.36	4087.26	5922.41	8152.27	9884.21	5881.61	924.56	8543.59	3480.76	1721.81
YOR027W	STI1	AIEVSETPNHVLYSNR	1715.64	4000.68	4211.54	2983.5	NA	NA	3784.75	3766.5	3703.38	NA	5827.59	4117.26	2739.76	NA	3879.31	NA	4419.02	2263.23	4336.82	NA	6823.95	NA	3394.52	3947.78	5579.42	NA	NA	NA	3298.91	2912.05	5212.59	3302.17	2999.98	5858.89	NA	NA	8610.07	6237.98	4937.55	7496.02	2758.03	NA	3418.71	3767.87	NA	2901.71	1670.47
YAL005C	SSA1	NTISEAGDKLEQADKDTVTK	16748.8	28901.6	NA	26705	9605.95	NA	32054.9	21442.8	17560.7	33603.3	NA	NA	17018.6	9668.64	19384.9	27962.3	NA	16429	50836.1	NA	22904.7	44713.3	32203.2	NA	23111.7	52680.5	11558.1	13782.7	19964.9	23949.6	29602.4	15985.8	33844.9	13061	18138.4	25157	15102.4	16067	14522.6	25042.4	21019.4	19169.2	12680.9	NA	18854.4	33478.5	13929
YNL209W	SSB2	TFTTVSDNQTTVQFPVYQGER	18315.8	12167.1	8274.11	20739	7478.98	23409.9	14738.6	21269.1	25274.2	18623.7	17989.4	9528.43	16157.8	9614.83	22531.2	21184.2	15829.3	22590	17638.5	11398.2	16346.9	13073.4	14411.8	21303.1	15935.1	23307	19403.3	20832.5	9825.31	18846.4	16627.6	21788.4	18382.2	24577.9	23290.5	16026	10040.7	21708.9	23206.9	10938.8	NA	NA	8126.97	8469.36	7508.41	7677.15	8073.77
YER057C	HMF1	NVLEASNSSLDR	27212.1	26908.7	29608.4	27016	20058.3	19813.7	19387.8	25997.2	30150.6	52998.6	36380.6	41679.5	43854.7	43902.7	28486.1	41047.7	45365.6	34470	31056.5	28854.9	27342.7	55036.5	39496	25606.4	32774.6	34050.6	27683.3	25612.6	34571.4	39829.8	35450.9	32509.8	52335	44121.4	27874.5	31646.9	38888.6	40931.9	27700.7	30172.9	12506.7	5989.68	23970	21034.6	37440.7	25643.2	27035.5
YFR053C	HXK1	LVLLELNEK	20657	19783.7	24893.7	24036	23577.6	24480.1	7400.11	26866.9	30560	32719.8	17155.2	2747.73	14967.5	6664.47	34847.3	33524.1	6400.44	19692.9	17613.7	25286.1	23239.8	19065.7	15070.1	38706.6	14905.2	32373.6	30718.5	38208.2	37885	16332	34086.4	21637.9	14369.3	25113.2	35066.9	36509.8	5335.13	18067.3	29535.1	17935	26411.7	2497.97	19114.2	18147.2	10243.2	12606.8	8126.54
YGL253W	HXK2	IFTVPTETLQAVTK	35956.3	46163.2	40663.7	26017.5	54561.9	20275	17848.2	12313.3	36747.6	22344.8	22153.2	28233.9	30606.7	39646.2	44259.2	18553.3	44929.6	41346	36225.3	27561.6	49003.8	22790.1	29388.1	46085.3	23438.1	32970.1	44885.1	34237.1	26963.9	14803.8	26553.8	44776.3	4309.74	16516.7	33335.1	17779.6	40121.4	69159.5	60350	19198.8	35250.8	19405.8	40928.3	32353.4	50072	10097.6	57179.1
YCL030C	HIS4	IQEIQDAVHNQALQLPR	65522.8	52822.6	25766.7	44708	58513.3	53604.9	NA	NA	59424.1	63966.2	57180.2	NA	18547.4	43368.9	NA	32955.3	63451.4	70616.9	NA	65427.9	50753.3	61512.8	3430.94	46999.8	15007.6	71991.3	38172.9	61955.2	26364.5	NA	36870.5	NA	38465.8	61353.6	NA	24280.2	89090.9	41385.5	33254.1	72816.6	70474	76238	64892.8	52065.4	69183.5	55745.2	56039.6
YDL182W	LYS20	SLNIDDVDSIIK	NA	17201.8	NA	17752	23040.6	19218.4	28088.9	20682.8	NA	28741.5	NA	35273.1	14321.2	29032.8	15681.1	20381.7	34434.2	18093.1	NA	18316	NA	NA	23459.8	NA	18359.5	22767.3	22494.8	17335.4	19959	NA	21374.7	16015.3	25945.8	NA	NA	23879.8	29871.4	NA	9515.78	13943.3	NA	50226.1	20559.4	NA	42954	18487.8	34884
YDL131W	LYS21	MIVAAPDYVR	NA	NA	NA	NA	NA	NA	9838.99	NA	NA	NA	NA	18740.2	NA	24301.8	NA	NA	18691.7	NA	NA	NA	NA	NA	NA	NA	1406.37	NA	NA	NA	NA	NA	NA	NA	8514.7	NA	NA	NA	18437.3	NA	NA	NA	NA	11708.4	NA	NA	13919.5	NA	10442.1
YIL094C	LYS12	STALMLEFLGHNEAAQDIYK	37103.9	32617.2	34132.5	32893	42739	38780.3	20690	30144.4	34873.8	28393.9	20426	15091.4	24599.6	13251.3	45095.4	41481.2	16686.3	41595.5	31502.8	19434.2	33160.8	12956.6	24277.5	38225.3	23136.8	43174.5	37969.7	39856.8	30779.3	19301.6	34401.8	24342	25274	27740.7	39782.8	24396	11521.7	34283.3	31072.5	31902.9	26522	4762.28	19137.1	22084	16246.1	24251.6	15850
YBR143C	SUP45	LSVLSAITSTQQK	2326.38	NA	NA	NA	NA	2181.08	1925.7	NA	NA	NA	1570.64	1745.68	2008.21	NA	NA	NA	NA	1353.35	NA	NA	2083.67	NA	NA	1994.95	1524.54	NA	NA	NA	1622.9	2316.89	NA	2412.57	1829.92	NA	2562.21	1302.78	NA	2272.76	NA	NA	NA	4205.67	NA	1151.17	2177.22	NA	1981.36
YER177W	BMH1	TVASSGQELSVEER	5667.07	3080.46	5425.78	9246	6706.22	5850.81	10390.8	12030.8	1971.91	28170.5	19892.2	22822.1	12892	22153.7	9363.44	13949.5	17649.7	5145.98	8175.15	11001.1	NA	28632.4	24210.2	7697.51	8487.83	14580.1	14904.8	NA	21399.4	24327.9	21626.4	5682.12	14943.8	10187.4	7929.63	21850.3	14489	7109.23	4206.86	2173.83	NA	29511.8	6315.84	NA	5232.09	NA	NA
YBR111C	YSA1	YKDGKPDEILLQK	8630.14	19842.9	8173.57	7251.5	6767.52	7940.39	60019.8	3208.53	6090.94	7060.79	10111.1	106615	9264.98	104749	6330.41	13121.1	87325.9	8550.78	7338.7	8120.79	11768.8	8582.47	9562.26	9238.72	20196.6	6282.5	6161.91	4702.5	3947.89	7883.81	6349.75	11163.3	43229.6	8156.31	6954.91	5304.68	110308	10304.4	6829.58	12885	8448.58	72444	5013.15	5166.25	47351	10840.4	44535.1
YJL034W	KAR2	VTHAVVTVPAYFNDAQR	33815.1	29055.3	20206.6	15955.5	22952.1	17420.8	38887.6	12727.1	11689.7	4871.82	18452.6	16059.4	NA	12785.3	8835.24	7453.44	7158.66	32133.8	25480.2	20223.5	38729.5	20969.9	26819	17867.3	36392.1	11964.2	10309.8	NA	7349.46	11079.2	5509.09	21554.3	19826.7	15709.8	7508.66	4600.1	NA	32614.3	16229.4	23966.9	42534.2	6149.39	12937	27036	26331.2	23933.6	25268.6
YLR197W	NOP56	LIELVSFAPFK	11166.7	7796.48	9154.97	6807.5	9092.75	9400.73	8017.93	6235.35	8885.43	9034.13	7296.9	2598.38	10837.2	NA	11046.4	9442.44	6410.51	12397.5	7324.78	7979.23	7384.3	7936.25	6878.98	8051.48	6976.07	9262.94	9306.18	8169.85	9502.61	3998.8	7054.83	7539.69	6888.1	7888.93	7929.63	10704.2	3609.52	9675.12	7304.3	7826.94	11454.8	7222.99	8682.48	7869.06	9211.19	8339.79	9043.54
YJR139C	HOM6	ISGVEVESPTSFPVQSLIPKPLESVK	NA	NA	NA	NA	17585.8	NA	4693.42	14459.4	NA	NA	NA	NA	NA	3286.68	1676.62	3565.81	NA	9398.41	4458.58	7500.02	21857.6	NA	NA	NA	8123.06	3200.69	20778.3	22307.6	NA	1490.73	20365	9624.52	4312.86	13615.5	33061.2	7913.66	NA	18258.7	12462.7	14903	24646.8	NA	40218.9	29747.4	21165.4	27453.6	24360.6
YAL044C	GCV3	NKLPFLYSSQGPQAVR	NA	3729.79	7226.56	4988.5	4851.18	4896.59	5866.15	3289.44	6414.12	2138.52	7134.15	6027.16	13961.6	5388.32	5682	2539.36	4173.63	6472.28	NA	4941.99	3782.35	2398.1	3437.56	3019.74	4596.66	2511.83	2464.67	3267.76	2642.79	3209.62	1437.72	6763.73	3781.47	11000.7	3098.91	2621.79	7411.5	15901.1	7583.88	5948.66	5743.19	9049.58	5480.88	5944.13	5456.3	7085.61	NA
YPL106C	SSE1	HVFSATQLAAMFIDK	10461.8	6425.55	9287.28	7278	7773.65	8371.04	90805.5	9452.28	6855.46	7656.67	6734.45	127199	9948.86	136520	6792.12	2069.02	95347.2	6785.11	4836.8	5845.34	6489.36	5464.6	4877.14	6621.57	54781.8	4412.29	5450.77	7747.27	5219.07	5416.13	4987.51	11185.9	69668.1	9632.46	6048.43	5493.97	NA	10102.6	9426.61	5362.69	9345.03	NA	8353.84	6736.84	99381.5	46028	81055.8
YKL117W	SBA1	VINPQVAWAQR	12833	31986.1	34374.7	32674.5	11781.4	29684.7	20542.4	15326	54120.8	22615.8	45651.4	6878	23072.4	6728.06	41895.8	31550.6	47720.2	31202.5	36204.4	40767.6	9432.19	15878.9	17417.9	16556.7	42045.2	33603.2	18741.7	44333.1	20359.9	48995.6	21163.1	44224.4	35069.8	69820.3	38472.9	26247.8	5340.52	8870.77	66219.7	24330.4	30546.5	NA	39274.1	37768.5	NA	44331.8	7035.08
YHR216W	IMD2	ESFPGLEVIAGNVVTR	NA	NA	NA	NA	NA	1648.55	4332.82	NA	NA	1524.35	NA	NA	NA	1564.15	NA	NA	NA	2534.21	1607.79	NA	1407.93	NA	NA	NA	NA	NA	NA	2998.43	NA	NA	NA	NA	NA	NA	NA	8360.17	4353	2272.76	3804.53	NA	NA	NA	2079.98	NA	3173.6	NA	2729.6
YBR011C	IPP1	SIDKWFFISGSV	6278.82	NA	NA	NA	1694.35	3050.87	9904.39	1409.07	NA	NA	2969.83	5273.61	8951.9	6832.62	NA	1780.6	NA	NA	2988.96	NA	5320.79	NA	NA	NA	4187.89	NA	NA	NA	NA	NA	NA	4318.01	5443.62	4057.95	NA	NA	7217.83	8040.31	2805.27	5760.94	11400.6	5498.13	6245.03	7092.41	12477	9778.37	12680.2
YJR065C	ARP3	KVVDIGYER	NA	5120.64	4676.72	5518	3913.77	4365.47	14006.8	5535.02	5462.58	11906.6	6650.52	19840.2	9279.28	20812.8	6210.73	9958.26	11646.3	6919.83	9508.1	4968.43	7156.03	9956.07	6253.26	5013.68	8060.14	6583.41	6541.82	5396.25	6973.64	8209.26	7745.9	7464.46	12633.6	8784.62	NA	6062.25	16595.4	8086.53	4652.72	6540.33	NA	16317.5	3591.3	3584.11	12237.3	4661.7	10021.4
YJR048W	CYC1	HSGQAEGYSYTDANIKK	NA	6879.12	NA	NA	6193.02	9910.63	14602.8	NA	2206.71	NA	NA	NA	11142.9	16200.4	5253.8	NA	7851.43	8125.18	NA	NA	8111.44	NA	6222.92	NA	NA	4245.12	NA	NA	NA	NA	NA	NA	NA	5685.6	8434.05	NA	10666.7	7292.51	NA	17142.5	NA	9287.96	NA	NA	NA	7139.03	6950.94
YGL009C	LEU1	ALAYMGLEPNTPLK	NA	56977.5	NA	NA	NA	NA	146395	NA	NA	NA	NA	231053	NA	235594	NA	48317	181944	NA	NA	NA	31440	NA	NA	NA	82019.5	NA	NA	NA	NA	NA	NA	NA	125756	NA	NA	14790.7	224415	NA	NA	32314.2	NA	195790	NA	NA	191786	74662.6	166905
YER110C	KAP123	VFDNFRPVVFGLFQSK	14024.9	2458.45	6629.08	4421	NA	6154.58	10044.5	4363.82	8800.66	NA	2709.85	NA	NA	NA	8035.76	4185.26	5228.2	13546.7	NA	1839.2	7176.19	1938.67	2272.21	2098.73	NA	3591.82	2957.7	1523.76	1927.3	2345.91	2588.44	1636.62	6988.52	3868.19	1603.63	NA	4079.59	2485.95	NA	2160.71	1719.7	4974.64	2874.23	13344.7	19811.5	19370.6	20650.8
YJL153C	INO1	LLIGLPSQNELR	30238.3	17029.3	10997.9	10237	19275.7	16322.3	NA	11222.1	35763.7	3282.06	13106.1	NA	7439	NA	11110.3	22524.4	NA	28699.4	51254.1	15903.4	48363.3	17468.5	5246.28	33276.3	34260.3	36165	13629.8	30577.5	7303.48	20233.5	4036.11	47678.6	16125	21221.6	23997.3	11159.3	NA	30669.4	23941.3	41732.5	27379.3	NA	20301.1	16905.4	NA	17884.6	6233.12
YOR317W	FAA1	AIFTDNSLLPSLIKPVQAAQDVK	NA	NA	NA	3404	2145.75	NA	7065.04	2293.32	5913.17	7253.13	4801.99	5114.34	5858.28	3521.48	NA	5610.08	NA	2593.4	4703.6	NA	1357.53	2812.57	4783.34	NA	3942.33	8063.01	1321.34	NA	NA	5859.37	2005.4	3456.31	NA	NA	2534.09	1514.28	4577.85	NA	NA	4835.49	NA	NA	8061.24	9263.31	NA	14320.7	NA
YDR037W	KRS1	FEVFVATK	20750.6	20599.8	19117.3	12816	16358.6	19609.5	34419	14772.9	19341	19641.9	20257.6	25719.2	19733.5	31623	15168.8	20654.6	39354.7	17962.5	14812.1	17757.5	24050.6	9520	23699.8	17360.4	19932.7	15604.9	NA	12169.4	15855.4	23531.4	14415.6	25954.9	31640.7	19137.9	14626.3	19257.9	39697.5	23778.8	16235.2	23925.9	24596.2	30618	7973.89	16136.9	23348.5	16508.5	27398.3
YDL078C	MDH3	ILVISNPVNSLVPIAVETLK	7429.54	12320.2	11200.1	13078	3426.28	2517.4	NA	3195.27	15755.3	5148.42	3854.69	NA	3762.14	NA	15233.2	20950.5	4308.28	25594.7	19569.4	6773.48	4409.72	4172.15	1945.01	NA	3542.78	25113	9091.67	NA	8802.75	3757.55	6295.52	6121.4	8244.64	8694.78	13661.8	2680.33	NA	5011.05	16257.8	8004.38	8995.07	1523.74	6822.16	9559.14	5195.11	9568.98	5801.95
YHR008C	SOD2	LAGVQGSGWAFIVK	1971.13	2211.47	NA	1321	2109.17	2282.02	8092.04	1338.77	1930.81	3009.34	3291.23	4055.91	2866.9	5824.91	1834.6	2151.92	NA	NA	1185.34	2159.78	2278.18	NA	3163.33	NA	NA	6650.28	NA	NA	2919.97	6904.02	NA	1577.17	4736.35	NA	NA	NA	NA	5774.62	1432.01	8912.14	NA	9586.68	2892.89	2642.25	1790.91	NA	NA
YDL055C	PSA1	KLATGANIVGNALIDPTAK	100891	115675	118304	115926	113387	118640	107587	120550	114715	119176	143704	79226.2	116781	86226.5	109930	117230	123743	114119	94459.7	122161	104263	142951	132746	141579	95915.4	124980	124982	135811	137982	123518	115167	113486	116132	133330	143423	157053	99773.1	115725	117140	101865	114820	103839	111966	109421	94933.4	84279	86673.3
YER003C	PMI40	LLQAVFSR	6774.53	8207.93	6598.87	4200	7309.89	9151.21	12299.7	3624.58	3840.04	1707.83	6472.94	9329.51	6117.32	7264.93	4467.09	6315.88	12416.4	6535.56	4640.98	5500.53	7834.29	4037.3	11102.3	4793.58	7972.65	3611.45	3717.52	2678.17	3557.34	7432.6	1959.3	7007.3	12894.3	6797.63	5748.73	2436.35	6970.8	8628.21	3546.98	9764.56	11992.3	8361.65	4097.62	5684.56	7841.75	7576.77	7876.49
YLL024C	SSA2	TTPSFVGFTDTER	85210.7	89483.7	98928.9	94033.5	78551.3	81820.8	54196.7	96437.7	100801	70417.2	85007.5	45314.6	83394.8	46736.9	93858.3	71041.1	70430.7	86630.5	83232	100009	88602.5	86942.6	82830.2	102880	88567.4	79652.1	89055.5	97583	89052.3	105343	123256	109665	59883.6	131143	128878	110306	83625	88807.2	116839	84364.7	98408.3	56676.6	79439.1	83280	65934.1	63776.1	59132.9
YDR099W	BMH2	AVASSGQELSVEER	NA	NA	NA	NA	NA	NA	NA	NA	NA	3959.43	1635.63	11540.6	NA	10625.6	NA	NA	10392.9	NA	NA	NA	NA	4858.65	5410.7	NA	NA	NA	NA	NA	NA	3643.76	NA	NA	NA	NA	NA	NA	8057.85	NA	NA	NA	NA	17191.8	NA	NA	NA	NA	NA
YNR043W	MVD1	VILTQVGSGPQETNESLIDAK	2007.27	6474.5	NA	3938	NA	3883.88	5579.66	2038.66	5735.4	NA	NA	7430.77	5611.96	7842.17	6113.39	NA	9163.99	6487.08	2324.96	NA	NA	NA	4497.52	1702.15	NA	NA	NA	1465.95	NA	3598.81	NA	2079.57	1746.97	8528.4	2843.01	NA	NA	4387.8	2678.33	5384.94	NA	2578.41	2410.74	NA	NA	NA	5006.65
YDL126C	CDC48	YAIKDSIEAHR	15269.3	12072.6	9926.95	8105	16557.4	10745	15532.6	9756.02	8572.53	5108.51	8806.63	8567.29	18596.7	6084.79	9395.35	7419.47	2499.9	13470.7	11554.7	12511.4	21426.8	13858.5	9762	9929.1	15269	6143.98	7880.74	6404.75	7764.55	7745.54	5618.01	12632.6	8993.7	8256.77	6558.84	5560.2	2598.61	8877.84	5367.68	21999.6	20616.3	4719.7	9502.6	10064.7	5900.15	11457.8	5937.44
YJR077C	MIR1	IQLEPTVYNK	5304.2	6596.28	5991.49	3709	6672.1	8663.48	14354.3	3681.17	4642.58	3984.37	5797.91	10089.9	7282.2	12994.5	3528.78	12446.4	11625.5	6223.25	2550.1	6827.46	8290.33	6025.01	17271.7	10658.1	6202.03	11967.9	5993.36	3193.43	10232.4	11309.1	2905.28	7549.69	17125.5	4376.36	7176.23	8970.32	7293.98	9490.21	NA	17241.7	5720.63	12720.5	2637.18	1985.08	5499.68	6228.24	4629.2
YBL030C	PET9	TATQEGVISFWR	85809.2	35982.8	48734.6	50240	61820.4	39375.1	27588.2	64516.4	26448.2	73829.5	55503.6	31646.6	58356.6	22767	53017.8	NA	21144.4	19848.6	45458.1	56745.3	58816.4	91470.9	63752.1	77008.2	41553.1	20793.1	76436.4	36831.8	75768.7	58667.7	84748.4	63618.6	NA	45146.2	39454	61032.3	27068.4	59071	33085.2	52079.6	64589	30841.6	72974.8	73013.4	41806.5	62262.1	45809.1
YER073W	ALD5	ALFNLADLVEK	NA	4580.01	NA	NA	NA	NA	16670.5	NA	6792.26	NA	NA	29662.3	NA	17024.7	NA	8022.22	19118.9	6692.74	NA	NA	NA	NA	NA	NA	2443.88	11403.8	NA	NA	NA	2899.53	NA	NA	6257.54	5805.2	NA	NA	30058.5	NA	9624.36	NA	NA	34113.2	2867.87	1193.19	34597.7	5307.96	34615.9
YGR094W	VAS1	SLGNVIDPLDVITGIK	15995.5	11219	12859.7	9709	11737.4	19201.5	15529.5	9760	11866.9	15120.4	8223.21	10582.5	9285.1	14711.5	7585.22	23047.7	9503.77	10573.1	10697.4	6923.3	9933.58	11643.1	15389	7647.37	6965.84	18000	9022.27	6018.42	14453.9	14880.6	3899.16	15221.9	21628.5	7775.71	11635.8	6968.09	7443.88	13751.3	2609.61	21815.9	13036.1	19104.1	14031.1	13296.9	21788.2	22737.6	16489.3
YLR259C	HSP60	VIEFLSANK	67108.6	41167.1	55115.2	47769.5	56614.2	54477.1	41380.1	59592.4	41867.5	57965.2	66843	43093.6	58145.8	36751.5	62271.1	34991.5	38592.7	39544.1	36439.5	62883.1	62666.8	61634.8	79142.7	64020.7	45441.2	36340.6	55417.5	40960.7	57473.6	60739.9	50224	56641.9	45420.7	47929.5	45278.4	70215	33841.3	70429.9	40487.1	57505.6	61815.4	46459.9	44516.6	49886.3	31002.1	44112.9	35480.6
YBL099W	ATP1	VVDALGNPIDGK	48874.2	35919.6	49891.6	44607	47500.2	42548.6	30894	44539.7	41316.2	50918.8	55963.2	33425.1	54027.1	29079.3	53514.1	38724.3	41043.5	39106.7	35708.4	51768.6	55527.9	54264.8	32737.4	51247.4	45482.6	37953.4	48167.3	43549.4	57862.8	45157.2	47415.9	54069.3	44715.9	51160.8	49257.5	63584.4	31815.9	54204.6	39326.2	2822.56	45635.2	41080.7	34354.2	38227.5	23721.1	38835.1	30075.6
YDL066W	IDP1	SAYVTTEEFLDAVEK	11012.5	20306.7	25512.5	22833.5	4899.63	10492.2	9057.38	11306.1	31387.8	10667.7	20290.9	NA	12828.5	NA	24480.2	14653.6	NA	17969.1	24087.1	8022.75	3953.68	9379.31	7182.45	8093.09	23284.6	16785.2	9077.7	21764.4	6382.24	26494	8299.56	27030.7	16933.4	44949	12915.7	8078.16	NA	5505.41	50109.8	12388.6	23120.7	NA	34362.7	30924.5	NA	42967.8	6285.41
YEL020W-A	TIM9	FQEQNAALGQGLGR	NA	NA	NA	NA	NA	2540.98	5849.34	NA	NA	NA	NA	2614.49	2266.18	NA	NA	2507.7	4681.41	1888.66	NA	NA	2035.8	NA	2133.16	NA	1967.58	2737.91	1622.39	NA	NA	2790.85	NA	NA	4414.52	1751.5	2721.29	NA	2238.26	2154.2	NA	5299.36	NA	4565.9	NA	NA	NA	NA	NA
YKL085W	MDH1	DDLFAINASIVR	9117.7	10999.9	7257.82	4039.5	8652.72	12993.1	18454.8	5065.48	7065.6	2816.44	5695.55	6597.9	11335.2	7242.92	4567.62	8993.4	8147.16	8681.42	7664.23	8286.04	11066.4	6305.22	12707.9	10825.5	10330.1	7526.47	7671.18	4012.43	5302.54	7762.61	3380.3	6600.65	12918	6124.67	6399.31	3635.73	6794.52	11654.2	3724.27	15252.2	17119.3	6855.06	9133.25	9107.57	11230.9	10590.5	11314.4
YKL029C	MAE1	HNPRPIIFPLSNPTR	NA	NA	NA	NA	NA	NA	9431.68	NA	NA	NA	NA	14203.4	NA	17713.8	NA	1872.14	25754.7	NA	NA	NA	NA	NA	NA	NA	1554.73	NA	NA	NA	NA	NA	NA	NA	14600.1	NA	NA	NA	18072.8	NA	NA	NA	NA	14245.4	NA	NA	5980.97	NA	NA
YJR045C	SSC1	DAGQIVGLNVLR	29440.3	24861.7	23020	17968.5	30218	33303.5	29392.4	23585.8	26535	28514.8	20330.8	13563.3	27528.5	18886	17567.3	32688.2	28063.3	26510.7	21920.7	23905.2	30975.4	26390.7	32644.7	34202.9	26103	33507.2	24240.7	14958.6	26170.8	31531.2	23152.3	36759.9	37030.7	23085.8	29205.2	22369.8	18261	29918.9	17087.1	33840.5	29009.3	26480.9	19389	24667.7	25093.8	29299.3	30423.5
YKL120W	OAC1	TGAGSSVQLPIYNTAK	NA	7892.66	6037.33	4141.5	2627.8	NA	NA	2737.22	5278.65	NA	5716.53	NA	5445.62	NA	6377.76	NA	3098.92	7691.93	6714.46	4526.67	4531.67	NA	NA	7324.49	NA	3616.23	4412.44	6279.03	4976.71	NA	NA	4654.18	2809.13	5789.79	8390.25	6549.35	NA	6835.13	NA	5268.55	3464.46	NA	6216.19	5773.14	5136.66	5966.72	4505.13
YDR322W	MRPL35	QPLIEDK	47889.4	30847.9	42005.5	37852.5	48580.5	41891.5	32411.8	43630.2	35973.8	42555.4	49210.8	30643.9	41883.1	25583.5	39967.1	30559.3	28363.4	32726.3	31479	42346.2	47469.9	38164.6	55187.4	42246.3	36526.7	28193.7	36423.5	30817	40678.7	39115.2	33605	42404.2	36672.1	35865.1	34465.6	46559	12973.9	46098	29476.3	48949.5	51019.4	26033.2	32846.3	37385.3	22429.3	37119.1	26161.3
YIL051C	MMF1	LAPPAAASYSQAMK	18481.7	18360.4	9872.78	29322.5	23434.2	12107.7	34666.9	26532.2	18620.7	17200.8	48869.4	52335.1	22818.1	45648.4	12981.6	26633.1	40374	32728.8	16741.9	23961.4	20018.8	21655.8	23732.4	14297	31488.5	20604.7	27479.6	17587.7	14661	31692.3	25520.6	30249.8	39298.5	24086.7	25393.4	14030.6	51710.8	22635.7	13819.2	32845.4	34215	40526.4	16981.6	31697.9	30288.4	23710.5	23939.9
YIL142W	CCT2	VQDDEVGDGTTSVTVLSAELLR	NA	NA	NA	2137	NA	NA	7008.37	NA	NA	NA	NA	8784.18	NA	8761.82	NA	8495.43	12511.4	1320.18	NA	NA	NA	NA	NA	1489.06	1268.75	NA	10787.5	5274.66	NA	NA	3944.36	NA	8535.91	1586.19	NA	NA	4713.96	NA	NA	NA	2163.41	2402.14	NA	1816.57	9125.34	5106.76	14549.3
YOL139C	CDC33	KFEENVSVDDTTATPK	NA	1466.54	NA	NA	NA	NA	NA	2073.14	NA	2675.65	4730.34	NA	4379.28	3702.48	NA	4084.51	NA	NA	NA	NA	NA	3416.18	3478.94	NA	NA	3993.56	4884.73	NA	4004.13	NA	4089.89	NA	NA	2536.62	NA	4402.27	NA	NA	NA	NA	NA	4854.56	1974.39	NA	NA	NA	NA
YOR298C-A	MBF1	INEKPTVVNDYEAAR	4305.65	9778.61	8110.02	7400.5	6962.32	7560.21	7382.05	9398.34	8728.21	NA	12335.8	7744.95	7586.79	9285.86	9541.1	12380.8	5177.24	8953.93	9540.4	10713.5	5943.12	11873.1	8530.99	6191.4	9353.44	13302.7	8368.36	7494	9120.09	9455.33	12943.1	6657.99	8638.82	11401	13251.4	10451.3	8446.99	5876.32	8714.28	8268.55	7800.31	7073.33	7351.38	7418.31	6202.44	5963.27	NA
YER069W	ARG5,6	LEAQGIEPDYIDGIR	9046.45	9920.88	6365.5	6032.5	4263.82	9329.51	14444.6	NA	9934.58	11250.8	12744.7	10199.6	20001.5	10760.1	11587.9	12972	16863.1	13467.6	8132.4	10325.7	6183.99	12064	15927	16397.3	11447.4	23353.7	12339.6	12240.6	11374.1	16067.5	9588.13	8767.02	14377.4	14946	15561.4	14846.3	11527.1	16939.9	13744.7	12950.6	6868.26	18972.2	11231.5	9143.01	10293	9733.99	10315.6
YOR375C	GDH1	VIELGGTVVSLSDSK	13976.1	13754.2	13447.3	NA	12187.8	9662.52	14136.9	2227.89	2558.66	5673.91	NA	7544.17	NA	9950.53	3571.33	7023.97	5769.96	3694.66	9760.08	NA	21344.1	9731.32	10071	8544.82	12658.3	4486.59	5311.96	NA	4223.73	8617.79	4870.9	7281.91	12258.7	NA	3396.77	10984.1	NA	2227.07	1643.4	16132	2672.8	11820.8	4342.73	7333.03	16694.9	17834.2	27282.3
YHR179W	OYE2	MSAEGYIDYPTYEEALK	7012.72	2674.14	1374.16	NA	NA	NA	2224.02	7794.74	NA	NA	3195.53	2985.69	NA	12272.3	1944.71	NA	2637.07	NA	8520.06	7408.58	NA	2830.66	NA	NA	7288.65	NA	4220.91	NA	4080.01	NA	3426.4	8102.59	4339.05	NA	NA	NA	8423	NA	8787.71	3515.22	NA	NA	3364.44	NA	7600.65	NA	1526.43
YNL287W	SEC21	IVVCNPELESLINDSNR	21955.8	3337.69	NA	6281.5	12802.8	NA	4946.9	NA	NA	NA	5988.29	NA	NA	NA	5035.18	NA	NA	4763.25	6350.66	NA	10624.9	NA	NA	7444.32	NA	NA	NA	NA	NA	NA	NA	11058.1	2690.63	NA	NA	4029.68	NA	14238.6	NA	NA	6687.27	NA	NA	NA	NA	NA	NA
YDR002W	YRB1	EEAAPKPPSSAVFSMFGGK	NA	NA	NA	NA	5604.17	NA	NA	NA	NA	2274.33	NA	NA	1717.91	NA	2167.59	2865.2	2895.68	3527.28	5793.03	NA	NA	3124.88	NA	3679.04	5002.35	NA	NA	NA	1521.13	6127.93	2023.93	NA	NA	7200.03	1795.44	NA	NA	NA	2878.71	NA	NA	NA	NA	1857.77	NA	3008.56	2601.25
YGR159C	NSR1	NEETEEPATIFVGR	NA	NA	6119.63	NA	4560.46	10787.5	NA	NA	2685.56	NA	17391.7	NA	23167.2	16700	12761.4	16722	NA	1797.83	12985.6	17956.9	7679.59	2865.11	1839.07	NA	NA	16319.7	8238.11	5754.13	NA	6475.01	NA	22355.5	23567.6	14004.6	NA	6773.67	42221.7	32842.1	NA	14306.2	NA	6920.13	16619.5	17088.3	14270.2	13002.8	32631.2
YDR432W	NPL3	SFANQPLEVVYSK	17619.6	19422.3	18762.1	16020	13489.6	17489.7	30403.8	7232.35	24915.1	51040.2	7338.35	16382.3	38849.3	16473.7	6447.44	8866.18	7244.23	31912.9	21428.6	18319.3	23456	4910.02	NA	5842.45	14339.4	8170.22	NA	8773.66	4432.62	NA	2024.38	20294.9	5563.99	15574.3	13661.3	NA	7346.74	31936.1	24442.8	28149.1	53568.3	NA	50736.7	49810.4	28536.8	NA	35003.8
YER009W	NTF2	NESMLTFETSQLQGAK	NA	9319.93	6934.85	6939	3477.7	NA	7026.43	8731.17	6283.61	5660.6	8080.42	6832.76	9638.43	10222.6	6469.78	6540.4	12788.3	8905.96	7212.46	4886.91	3882.63	1784.56	2473.61	4885.33	8559.45	6487.88	3420.98	4301.03	2786.51	1648.34	3432.28	8338.8	8186.64	NA	5597.96	3003.35	11741.7	9534.81	8919.37	6956.84	4221.03	13881.7	8398.79	4325.32	10459.6	7520.33	12489.5
YDL014W	NOP1	IKPLEQLTLEPYER	10508.6	9655.69	9324.26	9960	9691.97	10375.2	12850.9	9290.02	10088.2	7983.71	9695.59	8424.14	13726.9	7726.6	11605	12494.7	14008.4	12658.8	7510.66	10950.4	11117.8	11725.4	11310.3	10645.1	10828.9	9251.26	9786.59	8921.41	11067.5	10416.3	8277.42	12602.6	11986.8	11430.2	5442.11	12724	7190.25	12504.2	10321	7581.6	NA	16203.4	9453.83	8677.43	13649.7	10444.9	13740.7
YLR303W	MET17	LSGAQVVDNLK	4084.26	8450.93	9259.15	6658	NA	NA	52635.3	NA	2994.35	2914	NA	58652.3	5532.5	59067.3	5349.55	22913.6	88164.7	NA	NA	NA	10754.5	2829.5	11042.7	8425.5	15572.4	6527.68	8098.86	7303.59	5762.71	1733.12	4887.17	4303.28	44308	NA	5997.71	NA	71376.1	8332.35	NA	8016.37	9078.8	78077	4362.66	2279.26	44705.2	4882.72	47862.7
YEL002C	WBP1	LFDNIIVFPTK	7086	4474.73	9735.78	9488	10449.4	7547.47	NA	10956.4	9944.86	14236.3	4040.98	NA	NA	NA	16901.8	12576.5	NA	5313.37	7231.34	6737.68	10199.1	8078.1	4082.58	13812.7	NA	13167.9	18497	16451.7	16208.9	NA	18449.9	NA	2406.22	2594.56	16514	14454	NA	2248.28	4080.96	2768.36	3648.47	NA	4597.58	4826.75	NA	6327.76	NA
YLR438W	CAR2	LAPPLVISEEDLQTGVETIAK	9812.41	13911.3	2196.67	NA	11088.7	2216.93	9842.73	NA	NA	9718.15	NA	NA	7925.29	5821.85	10040	NA	2211.71	2244.86	NA	NA	NA	NA	9902.7	NA	1294.84	6268.17	NA	2519.87	10432.8	NA	NA	NA	1814.96	NA	NA	10387.2	NA	3445.3	NA	8338.73	NA	NA	NA	NA	5771.83	NA	2740.54
YNL055C	POR1	NELITSLTPGVAK	25544.8	18605.1	17043.1	13752	17347	20706.1	40629.6	33879.5	18779.9	38989.5	41256.8	72294.3	15576.7	92622.6	6394.25	47436.7	31741.7	15255.3	28429.4	26566.2	20517.2	47241	41500.1	30121.2	42724.1	53028.7	18967	19485.9	33219.9	56396.3	23241.8	55479.2	61147.2	18306.5	18955.4	21414	71371.3	17778	11110.4	42358.9	16835.5	93665.2	39414.9	30630.8	45271	32019.7	22400.2
YMR146C	TIF34	YCVTGSADYSIK	14676.4	16979.3	9417.5	5374.5	6197.96	6553.63	22635.7	9005.73	8482.62	12948.7	22447.5	23106	30382.1	23749.1	11706	6597.39	25364.6	9408.62	13228.6	26156.4	25010.6	37903.1	29352.2	38698.1	25516.2	37771.4	28984.4	27355.6	26146.7	27810.7	24908.6	18529.9	17664.9	16270.1	19957.3	32700.6	29647.2	24463	31112.9	20059.2	32266.7	23374.9	32161	17672.5	10314	18004.4	4028.81
YDR127W	ARO1	ILAMATELAKFGVK	7978.69	5157.06	5836.78	7394.5	9513	7896.05	NA	10804.3	11399.4	14072.8	8074.79	NA	NA	NA	16798.1	14811.9	NA	4632.61	6270.64	6102.03	9678.61	4522.99	7523.45	19424.5	5003.88	16994.8	18348.7	18727.9	20684.8	5251.7	20764.9	7458.68	2539.07	6408	21426.8	24964.7	NA	4844.09	8170.85	6660.72	8121.69	NA	6069.89	6509	NA	6516.47	NA
YKL182W	FAS1	VAASFSQEALQYVVER	77848.3	63448	70983.2	62861.5	88400	87441	40979	82235.6	64556.3	75486.9	58229.3	40418.4	68428.4	35321.8	82156.6	67169	41956.5	73221.6	56899.5	49516.3	46427.8	56465	75046.9	69181.8	60835.5	43980.7	50271.9	42894.7	52933	66116.8	47622.5	71079.9	58564.5	73075.1	49525.8	51009.1	31861.5	72678.2	66282.1	66929	62252.6	50084.7	57542.3	66849.7	50129.6	71485.6	56922.4
YNL135C	FPR1	GSPFQCNIGVGQVIK	25654.8	15750	16542	17106.5	21553.9	17701	33096.8	14911.3	19678	17249.5	16181.8	27673.1	24003.1	20210.5	17691.2	25713.7	31383.7	20966.2	17414.9	19105.3	18256.2	22319	16087	23734.3	26192	28345.5	20610.6	18113.5	18741.9	18876.5	18069.8	23908	28170.5	16610.3	23837.8	15776.9	23087.7	21908	14078.8	24418.8	17644.7	32907.1	15713.7	16529.6	26998.4	19808.3	27529
YKL188C	PXA2	MISTASAFYQK	51916.7	65492.7	66998.2	74166.5	60458.3	64140.5	108517	78883.8	79350.3	156683	98099.2	110487	81494.7	159686	74619.2	77560.2	156967	60109.1	62037.5	89500	45485	142771	144194	50042.1	66307	81168.3	68190.2	55211.9	107209	147565	93068.7	52951.4	98039.4	89359	53894.1	94429.4	160280	64790.2	61519.2	67349.5	84357.5	242689	73437.9	55918.1	84577.4	72779.4	69781.8
YLR060W	FRS1	NSGFEIIQGLLGK	2533.52	NA	NA	NA	NA	1938.64	NA	2701.41	NA	1931.77	NA	NA	NA	NA	NA	NA	NA	NA	NA	NA	NA	NA	NA	NA	NA	NA	2507.49	NA	2148.24	NA	NA	NA	2030.13	NA	1967.88	1843.71	NA	1325.91	NA	NA	NA	2887.77	NA	1622.1	2471.29	4453.6	1741.3
YFL022C	FRS2	LETDLTSDMVSTNAYK	9101.42	8009.89	9578.46	9966.5	10603.7	10580	2735.34	11514.4	7852.72	9601.19	13961.2	2995.61	5575.94	NA	13447.5	7532.31	11218.4	9259.61	7409.27	8013.38	8599.23	10253.2	20367.1	15189.5	10163.8	12963	12524.4	13171.5	14838.6	12554	12504.3	9300.99	11154.8	9601.63	15187	18381.6	NA	5502.69	9261.9	6669.27	4298.24	2787.22	7368.77	6179.39	NA	NA	NA
YKR097W	PCK1	GAVTNLANLFVQNFK	3026.17	3113.47	9057.56	8184	NA	3662.18	NA	NA	7867.62	4665.06	NA	NA	NA	NA	10174.6	11117.7	3453.17	10177.7	8261.62	NA	NA	NA	NA	NA	NA	8882.42	4602.17	4822.72	NA	NA	5898.23	4984.55	6745.27	8865.41	6733.59	3945.93	NA	4192.01	1761.42	2440.28	NA	NA	NA	1756	NA	4477.3	NA
YGR240C	PFK1	AVLEFTPETPSPLIGILENK	22660.2	16672.5	17324.4	20511	28054	28312.1	14587.8	19147.7	23386	10377.2	7901.81	15552.5	13597.1	14669.9	22203.5	17432.4	NA	21295.8	23731.7	8717.89	17699.8	4048.39	3946.85	5823.39	12311.5	4224.42	17381.6	16974.3	13502.3	2815.89	12491.6	17787.6	7252.96	13798.3	20840.8	9679.61	2298.22	12002.8	27375.5	21771.4	17701.9	NA	24108.7	26617.3	14663.8	20826.4	20938.4
YMR205C	PFK2	AFVVMEGYEGLVR	63807.6	104598	102158	105482	100959	112002	143413	99272.2	95868	68437.2	113482	145266	162217	136753	77819.3	94198.7	83394.5	126465	96346.3	98958.8	81247	86316.8	86308.1	85242.2	146227	112519	91624.7	102365	81377.9	111789	76262.1	160963	144583	128713	86260.9	62928.6	157765	164762	147127	135500	187659	65293.2	139840	145912	206987	161555	178568
YMR105C	PGM2	TAEEYLKPIINSVIK	16094.3	12923.4	12948.7	12528.5	16507	13986.5	18723.2	13327.5	16631.3	17753.4	17875.3	13225.5	19694.8	13011	15780	16744.5	17361.5	17748.1	14621.7	12730.1	15423.7	15117.7	18488.9	22547	18640.9	23407.8	16398.3	17114.7	17750.6	17732.3	15129.3	19596.3	20277	21593.7	17569.4	18266.7	16194.9	20468.4	14657.4	16146.8	12218.4	19425.9	15934.6	13419.7	17137.4	14929.9	15534.3
YKL152C	GPM1	LLPYWQDVIAK	182434	178231	147124	171636	144521	144601	181646	184338	136522	247738	194981	182444	180837	175135	153226	141455	133060	116727	234277	179322	190536	125092	142683	150147	219652	143863	178054	188788	122934	225781	201290	210663	153736	194253	149020	158834	186509	215971	235004	155392	173052	229058	193851	177901	235225	154203	185620
YMR300C	ADE4	VSGLAGSMGIAHLR	6809.65	NA	NA	NA	7010.28	NA	NA	6924.63	NA	12732.5	NA	NA	NA	1325.07	6469.78	NA	NA	NA	NA	NA	7243.71	2574.98	4476.55	10296.1	NA	NA	12534.7	NA	16278.1	NA	16557.1	5252.85	NA	NA	NA	19646.3	NA	NA	NA	1853.75	NA	NA	NA	NA	NA	3707.82	NA
YOR184W	SER1	ASIYNALSVK	410269	293896	219128	208099	332589	247909	342469	270523	212719	227143	278599	187101	290900	160993	229629	244144	85323.7	311660	317116	237173	457288	310401	315006	405028	374003	270325	271013	262382	119450	135389	224720	398074	312995	196283	303781	318228	187321	335132	220248	491512	375635	11273.1	248999	238958	86662.9	275181	197828
YGL008C	PMA1	TLANTAVVIR	68776.9	58455.4	65499	60663.5	61338.3	52617.7	69084.7	62069.6	64946.8	90513.1	76534.5	64889.5	54303.7	63737.1	58427.5	72843	91573.8	62578.5	56325.5	77726.2	55990.5	75153	NA	64498.5	65862.4	60285	72494.5	55227.5	75003.2	71859.5	67316.7	74610.4	83544.7	60839	52563	68384.9	76548.1	52465.9	62868.4	61521.8	73770	80162.1	62645.8	60373.7	66118.1	52524.3	52540.8
YGL206C	CHC1	YEELIPFLLMAR	NA	17840.9	NA	31822	37348.9	36270.4	8836.91	NA	23540.7	NA	13490.4	NA	NA	3874.31	29266.4	NA	NA	11005.9	14224.6	NA	21625.8	22003.8	10873.3	NA	NA	NA	NA	20112.2	NA	5830.92	NA	NA	NA	3982.47	12022.2	NA	3070.49	19650.5	5252.8	NA	NA	NA	NA	61218.7	NA	4630.25	NA
YBR025C	OLA1	GASAGEGLGNAFLSHIR	11389.1	10097.9	10805.2	12202	11110	12807.7	7160.95	12461	12176.2	9652.74	10158.7	6727.41	8896.28	8523.96	12205	7777.55	7115.87	10678.3	8780.49	9322.14	11175.2	11215.2	8118.82	10602.9	8859.24	5797.96	8720.77	9561.93	8106.9	9527.59	8737.07	12922.5	8266.47	13479.9	10610.8	9599.71	10371.1	11782.5	11551.5	9296.13	12169.2	12869	9550.94	11427.2	14373	6820.64	10874.7
YOR122C	PFY1	IVEQLADYLIGVQY	4087.32	5818.34	NA	2456	3872.74	2101.37	7990.52	3790.82	6842.61	2599.16	2829.61	8580.92	5430.79	7968.74	6988.4	7017.64	NA	4990.34	6492.8	NA	5318.27	NA	NA	NA	5461.25	NA	4384.05	4151	2079.5	NA	1796.14	2311.57	2810.38	NA	4238.23	NA	NA	3854.28	4753.96	8592.06	NA	NA	7287.77	5743.48	NA	5508.73	NA
YML074C	FPR3	VLEGGIVIEDR	NA	22206.9	14880.3	21194	19030.9	18706.7	26771.7	NA	21715.2	20146.9	30773.6	23981.6	NA	22562.2	20361.5	21284.4	NA	22727.8	19804.9	18863.5	NA	25009	NA	NA	22438.4	24685.3	NA	23692.8	18777.1	24106.6	20289	24082.1	26870.7	24244.1	29776.9	25983.8	28902.5	21122.1	18221.1	28578.2	21268.1	19814.6	20204	21561.1	19015.1	17272.8	21889.1
YCL043C	PDI1	SQEIFENQDSSVFQLVGK	17865.9	10520.1	13214.9	11886.5	15491.9	14488.8	10483	17595	13691.9	22516.6	11692	5546.89	11348.4	5521.01	11880	18096.8	7438.03	16129.4	19952.5	8861.65	10873.4	12051.2	15045.8	11670.9	13455.4	19553.3	10782.6	10794.8	11976.7	13719.3	12333	19769.9	12084.1	10501	10913.3	10208.2	7042.15	15068	12055.6	17018.7	5439.36	7027.19	7631.68	7660.99	6555.41	9798.18	5567.59
YDR032C	PST2	SPSALELQVHEIQGK	8077.93	4647.16	1633.05	2813	1699.79	2764.09	15451.7	7183.72	6947.43	14090	10165.4	11349.7	7226.57	12342	2413.33	15392.2	12106.9	3426.74	9782.44	7702.72	4607.25	12900	9204.16	8552.34	9906.47	15896.2	3646.31	2434.07	7383.38	11267.5	5833.6	8764.39	20871.4	1524.52	7528.49	6800.17	11646.4	7587.82	3743.68	11660.5	5823.41	14973.6	9343.16	3993.24	10445.5	8068.79	9852.63
YMR290C	HAS1	KPRNGTGIIVITPTR	NA	2626.33	NA	NA	NA	NA	11926.6	NA	NA	NA	NA	8033.11	NA	7688.69	NA	NA	8084.87	NA	NA	NA	NA	NA	NA	NA	2524.71	NA	NA	NA	NA	NA	NA	NA	8051.29	NA	NA	NA	21331.5	NA	NA	1919.36	NA	17664.4	1081.76	NA	13404.9	3413.12	13358.5
YGL037C	PNC1	TTVLLDYTRPISDDPEVINK	7964.44	NA	NA	NA	NA	NA	12792.9	NA	NA	7438.27	3164.82	5005.9	5615.14	NA	NA	5242.79	NA	1904.48	6781.56	3134.74	NA	7225.81	7840.72	NA	4855.52	10497.4	NA	NA	NA	8006.71	NA	5248.64	11337.6	NA	NA	NA	NA	NA	NA	9384	NA	15836	3794	NA	2712.4	4625.94	NA
YLR044C	PDC1	TTYVTQRPVYLGLPANLVDLNVPAK	818754	672526	682302	696009	896245	834091	463889	685288	868080	369038	439275	405646	728080	387064	874030	719623	235236	837989	875189	676430	852252	402431	268214	660931	556215	637673	886309	912712	772177	234524	837812	724978	272598	596984	972115	628719	205925	678442	901596	750888	NA	65758.7	1.01459e+06	1.03038e+06	698697	566023	774639
YAL038W	CDC19	GDLGIEIPAPEVLAVQK	289017	252740	242756	298930	306721	280537	270297	316955	302242	387543	279281	271896	269478	274232	250547	323172	262750	309913	280808	273743	237496	271484	321930	313358	287653	396774	414899	379396	355968	330928	199818	264563	318702	301028	344642	372552	301005	101047	314769	261744	178558	421183	378826	356279	441981	416559	447196
YPL037C	EGD1	VGVQVAAQHNTSVFYGLPQEK	8239.78	13109.5	12001.2	10811.5	8370.9	10204.5	14131.3	9011.92	12472.7	14067.8	20217.2	20283.2	15595.8	20143.2	13425.2	19536	28496.8	13963.2	8627.42	14591.9	7568.73	11304	19242	16316	5611.66	20487.4	13757.8	13310.5	14593.6	15764.8	12742	NA	16826.1	14215.1	20754.5	16656.7	26430.4	19804.9	13830.2	1511.98	NA	33851.2	NA	NA	13802.6	NA	NA
YGR180C	RNR4	YLIENFSAQLQNPEGK	8684.59	NA	2161.77	NA	NA	4440.47	NA	6469.24	2335.68	NA	4988.28	10222.5	2388.02	7705.2	3184.09	5304.97	4426.58	1482.97	4323.4	NA	3957.71	4572.61	NA	6877.27	7621.7	2530.94	3155.09	6156.52	3645.72	3750.16	NA	4781.49	5608.9	7281.36	5448.57	5945.18	NA	NA	9106.11	NA	3137.07	12394.6	2935.72	5381.73	23307.4	3775.03	13216.4
YLR075W	RPL10	VDIGQIIFSVR	171295	149632	155040	140540	185120	173393	116860	156515	188333	155074	123483	90864.7	156032	88069.5	182872	165417	96727.8	174466	125422	133614	154229	138242	120696	129701	126237	151408	153970	156269	139390	108355	130766	125932	119169	145499	165819	158839	83367.8	160466	139732	149759	158699	102341	131255	138837	126572	168133	125143
YMR142C	RPL13B	DGKAPEAEQVLSAAATFPIAQPATDVEAR	11409.5	7612.67	9303.43	8233.5	15560.2	13167.2	11360.5	12579.5	14195.9	6673.33	7416.14	7029.82	18119.4	7027.68	19745.5	14257.5	7393.36	8414.02	5842.73	7469.72	8771.06	6881.97	4235.42	12848.1	10096.8	13078.7	16584.4	14836.1	18139.3	3781.45	13411.8	10427.8	4277.93	13760	16997.2	14767.2	1825.14	12461.3	13466.1	13376.8	2800.65	NA	6418.04	5094.14	NA	4677.21	NA
YLR029C	RPL15A	YLEELQR	22367	39606.1	42988	37940.5	11626.6	37143.5	33417.6	35405.3	41262.7	20917.4	46143.2	32012.2	36645.7	NA	40131.5	49914.5	44531.3	44663.5	31076.4	NA	27453	47952.6	19829.1	19243	36245.8	37315.5	990.557	30388.9	39690	41500.9	17065.1	14277.1	39970.8	43232	998.235	41569.2	32269.2	22786.3	31421.9	2744.39	41052.7	35800.8	33329.3	27414.2	21164	33968.8	14874.5
YIL133C	RPL16A	AEELNISGEFFR	43947.2	24259.6	25157.3	21827.5	38605.7	28098.9	30709.6	32230.8	23901.9	33540.1	26199.8	17279.6	41989.6	15321.1	28695.6	17936.1	15162.4	22567.5	24178.5	24310.6	48477.7	35643.4	31633.8	52148.8	26933.8	29449.4	38200	32667.9	38214	25371.4	32973.6	33469.3	25925.2	22852.4	31731	36438	14965.7	41405.1	18905.1	41984.1	28168.5	6637.39	41291.3	41140.4	31387.1	46883.7	40117.9
YNL069C	RPL16B	IFEGIPPPYDKK	3931.58	7435.11	6545.21	5695	6050.13	6443.72	8883.62	5023.47	9217.34	NA	8531.3	6542.12	12215.6	3312.36	8394.28	9248.43	6986.88	11782.6	5749.29	8804.37	10226.9	4552.76	5299.25	6150.29	6082.83	5727.38	4332.67	4560.73	4186.68	8496.6	2744.83	11357.4	9504.51	6331.45	6732.67	4482.6	3853.55	13352.1	7764.85	6379.43	11578.6	4851.01	7241.13	6846.85	6844.92	8159.27	5795.3
YKL180W	RPL17A	YLEQVLDHQR	10031.3	2725.35	2998.87	12804.5	9304.85	8749.33	6271.59	6122.61	15268.2	9101.2	5857.27	6077.35	7730.35	4955.39	15093.3	14126.8	2610.64	13788.6	11330.1	10159.4	12268.7	20469	5075.23	7428.27	16188.3	3794.55	5516.56	5120.95	5671.21	6567.18	4772.82	10508.9	12565	10253.3	NA	4472.34	7927.74	8758.19	8054.92	10275.2	11081.3	2890.73	8040.89	9175.55	4300.56	8930.04	NA
YBR191W	RPL21A	HGAVHLSTYLK	9228.14	7717.38	10347.8	8857	11516.9	10662.5	5988.84	10000.1	8094.71	9066.28	11512.9	6312.22	8964.09	6188.74	12395.4	9834.49	5587.49	9312.17	7147.35	13945.8	12820.5	10073.4	8826.74	10526.7	8295.47	8671.73	10792.5	7783.52	13215.3	8419.22	10174.3	9367.27	7740.07	8486.41	11343.5	10733.3	3492.6	8010.94	6275.14	8196.09	5885.08	5769.63	4807.49	5108.56	3670.87	5896.49	4107.72
YLR061W	RPL22A	TFTVDVSSPTENGVFDPASYAK	28566.4	33577.2	28142.1	26134.5	40136.4	36380.8	18930.6	20420.2	36214.8	5671.69	14575.4	10544.1	25187.6	9106.7	37330.3	34065.2	12092.4	47885.6	45484.4	22978.7	29416.8	5535.82	11759.4	19706.3	21864.4	13632.8	16637.1	21651.1	15792	7990.2	13832.2	23851.7	20860.1	26361.3	27566	12445.4	6224.92	24326.5	39450.5	28106.9	13278.3	NA	10910.5	11499.3	NA	8198.47	4469
YGL031C	RPL24A	MKVEIDSFSGAK	24037.9	43259.7	44785.1	17577	39179.2	34513.8	53445.6	38670	47294.6	65536.5	47092.6	40855.9	54965.8	64113.8	36209.6	51185	35274.2	38327	83572	49695.3	43467.3	66473	27763.7	31839.4	53839.5	36571.5	36217.1	22872.5	37208.4	48827.1	49353.1	49038	46846.4	29338	18062.8	43519.3	52902.2	29047.7	19079.8	NA	2497.82	44928.5	82524.5	56654.4	41215.2	59387.1	29652
YGR148C	RPL24B	MKVEVDSFSGAK	21078.9	18956.3	27867.6	26629.5	22236.7	25273	14924.8	26836.4	24504.6	31071.2	29639	17732.6	21782.5	15250.2	28031.3	21081.1	20260.9	21929.6	19061.9	32901.8	19834.4	32724.5	35340.1	22518	21844	19129.8	24483.2	17406.9	27167	30846.2	24156.1	18398.9	20959.3	25263.1	17605.4	30486.9	14200.6	20371.1	19128.1	24829.6	35067.3	22781.6	23369.1	19684	10454.6	24722.1	11329.6
YOL127W	RPL25	LTADYDALDIANR	78899.8	99754	91697.6	88165.5	96933.6	94741.7	93817.3	88132.7	91018.4	87941.7	85484.4	74035	106874	77037.3	103390	104294	97377.7	107197	78499.6	100210	83529.2	102360	97998	105920	96396.3	104059	88760.7	92645.6	101850	98677.3	86404.8	88711.8	93408.5	109932	121046	103830	84953.1	104107	98027.1	95472.4	95747.6	88283	82726.4	82237.6	79663.6	87344.8	76420.8
YGL103W	RPL28	IPNVPVIVK	47247.7	32622.9	32989.7	30947	49187.2	37987.8	24935	37466.9	25670.8	31460.4	40858.1	22912.6	26415	18945.3	36675.6	28373.4	27136.5	31638.3	27782.8	41511.2	51014.4	37287.8	52584.1	46080.3	39068.8	30146.7	38063.4	31596.6	38655.4	29573.4	33925.5	37509.6	24842.4	26917.3	40715.1	45276.8	18519.5	35276.9	23983.8	42159.2	39599.7	18590.7	22677.1	24651.6	NA	25953	NA
YOR063W	RPL3	HAFMGTLK	143422	117153	133604	151730	171293	140032	100475	148673	113791	122135	161027	133631	144128	116794	129774	100469	91111.3	135145	136592	140793	130515	182361	131798	76616.6	142065	71447.3	97797.4	87761.9	105965	166162	104976	174599	111996	157635	93260.1	95227.5	121128	121571	102762	151360	154759	103683	104646	107087	84359.2	108187	72316
YBL092W	RPL32	TYAAEIAHNISAK	36945.1	27279.7	27216.9	23482.5	43865.8	38463.3	30086.8	34621.8	34840.9	35741.8	41087.4	29933.8	43324.5	26119.8	41898	35264.4	28860.5	37496.7	28048.2	46988	52242.9	39117.9	48167.2	46247.7	42564.5	32488.2	39208.6	32108.6	41584.7	35039.6	33767.3	36701	34564.6	35531.3	40808.2	41460.7	27458.7	44692.1	29139.6	46160	49958.5	28762.4	29797.8	29690.6	21119.2	28986.1	19807.5
YOR234C	RPL33B	IEGVATPQEAQFYLGK	16424.6	12849.4	14527.6	13663	14863	17136.9	11777.8	17835.5	NA	NA	NA	NA	17992.3	NA	NA	12768.2	12641.7	13590.1	11363.4	13396	16507.1	15906.4	NA	21713.8	15585.7	NA	18329.4	15180.7	19480.6	14239.9	16565.7	14823.2	NA	13701	17832.7	19835.6	NA	NA	NA	13963.9	15597.6	19546	13784.3	13958.6	13755.6	13286.3	14968.6
YLR325C	RPL38	GSSSLYTLVINDAGK	68645.6	NA	57246.8	51931	73298.2	63684.9	38457.3	60500.1	57028.8	53931.5	47886.3	34924.2	61867.2	31471.4	64472.8	54819.4	35452.9	56471.6	46081.3	NA	1935.02	12470.3	57253.8	75991.4	54008.8	59740.5	58701.1	51522.9	57933.8	52042.4	52129.1	58779.3	51851.6	58729.8	64642.3	57776	28860.5	67737.3	55619.1	54061.7	2189.48	45313	45569.1	49763.5	38459.9	54052.4	43929.9
YBR031W	RPL4A	TGTKPAAVFTETLKHD	9342.66	11835.3	13069.1	9941	10918.6	13059.6	8532.36	9505.78	14725.1	10255.8	13864	9577.39	14913.5	3469.51	14985.3	11869	7878.49	10984	9173.12	5727.46	13407	12493.1	8722.46	13960.1	8184.45	11058.8	10168.8	12297.4	11448.7	NA	8512.89	12671	10281.6	13233.8	11953.9	10430.8	11290.8	19142	9822.12	10120	12449	6748.59	8045.98	7286.06	5783.25	7431.14	3862.42
YPL131W	RPL5	VFLDIGLQR	92056.5	98598.2	100458	96225.5	84563.9	98481.3	79296.7	88470.5	97295.8	96087.8	87173.8	64903.8	95728	62703.1	52079	98065.6	75686.6	99746.6	77835.1	100998	91603.3	86853.9	81427.1	114093	81363.6	94259.2	86325.3	88368	84266.6	86954.6	78110.7	80849.1	88610.4	98616.2	99714.7	92135.7	64313.5	107967	81415.8	83806.1	101860	97886.8	86378.3	86984	100530	91829	92095.4
YML073C	RPL6A	WYPSEDVAALKK	NA	NA	NA	NA	1770	NA	3227.35	2242.04	NA	NA	2144.85	NA	NA	NA	NA	NA	NA	NA	NA	NA	4269.13	NA	NA	1741.25	NA	NA	NA	2630.45	2112.53	NA	2090.37	NA	NA	NA	3779.92	1892.85	NA	2944.41	NA	5499.06	5991.87	NA	NA	NA	NA	NA	NA
YHL033C	RPL8A	YGLNHVVALIENKK	4234.91	NA	1839.85	1149.5	2465.64	1269.31	NA	NA	NA	NA	NA	3923.91	NA	NA	1017.57	1430.59	NA	2660.77	2682.31	1380.92	4652.1	NA	1694.5	3022.25	3829.27	NA	1511.52	1381.52	NA	NA	NA	NA	1219.95	NA	2559.45	3661.36	NA	2125.37	NA	5679.35	NA	NA	NA	NA	NA	2088.29	NA
YLL045C	RPL8B	YGLNHVVSLIENK	13096.6	NA	12298.1	11612	15135.5	14201.1	6573.03	13113.1	9778.39	15583.8	10598.4	NA	NA	7438.59	14508.7	11474	NA	11360.1	7904.28	15848.9	11859.5	12229.2	13840.2	15992.7	10223.7	10710.7	14356.3	10212.5	15649.6	13658.4	11612.1	11322.7	8426.76	11578.5	13661.8	17309.1	6793.32	9620.2	NA	7417.85	8678.71	18231.1	10610.2	11228.6	11300.7	NA	12151.1
YGL147C	RPL9A	YIQTEQQIEVPEGVTVSIK	32825.3	38027.5	41481.5	43346	40266	53029.9	16512.3	49174.9	37760.3	42445.1	35794.6	17847.2	30302.1	13464.7	45018.8	34781.4	20019.3	42034.4	36600.5	30965.1	35898.6	33315.9	36935.8	55296.4	31824.1	34932.1	46692.3	43014.4	45297.4	28704	21167.2	20136	24781.3	29666	41106.5	45118.2	11892.8	40304.9	25035.5	28223.3	20355.1	14592.1	24609.9	24974.2	16635.6	25988.3	16960.4
YNL067W	RPL9B	YIQTEQQIEIPEGVTVSIK	4778.46	8893.68	7985.01	6512	13176.1	9575.73	9616.03	NA	10019.9	8173.29	4772.82	8102.52	6919.86	8977.06	14706.6	15446.3	11791.6	13223.7	7663.73	10682.7	13722.5	NA	10019.7	19289.6	6322.77	15057.7	10855.1	8549.76	16503.5	4444.31	7698.44	3864.01	6049.85	3702.34	16904.5	12329.2	9316.39	8380.21	4530.5	10838.9	4724.91	7515.78	2959.89	4784.72	11208	8057.16	13505.4
YDL130W	RPP1B	AAGANVDNVWADVYAK	44930.5	48722.3	44497	43634	55126.5	NA	48863.6	46657.9	34738.7	39559.4	44331	43130.8	65842.2	40035.7	38104.8	42827.8	36880.6	45450.9	40339	51001.9	49244.6	31545.9	47853.8	43967	41616	35861.4	38703.4	40627.2	32419.1	43443.4	39243.8	44757.3	20999.9	47052.4	51189.4	33529.1	42434	67121.1	49718	46855.5	61512.5	61454.8	50927.9	50559.5	59664.5	57680.1	60152.6
YDR382W	RPP2B	INELLSSLEGK	92456.5	129422	113449	112629	103225	119151	96640.5	117404	124740	46042	124415	65473.9	129127	136571	117962	121051	94678.4	131590	115294	126195	112487	135399	NA	124325	111531	132189	99591.9	117469	109198	145766	112905	146299	108469	128907	124307	111598	126704	121330	112518	104815	118280	178320	137503	132684	148153	151314	116787
YDR064W	RPS13	LSSESVIEQIVK	114602	105757	105915	107537	NA	118298	87063.1	109338	108250	89201.1	95890.4	75873.6	112294	70073.8	114878	92594.3	80028.8	97774.2	86457.5	114651	104321	67722.3	111764	148180	88716.2	103897	104364	98135	111156	103412	95847.9	106230	98015.1	119253	111509	123772	70730.9	129562	107355	101460	108618	104746	96696.3	100967	97628	111594	109424
YGL123W	RPS2	ITTIEEIFLHSLPVK	179502	136571	162618	154636	216253	216189	134669	156126	188550	172072	154164	108581	182026	103530	220740	111936	102340	153915	152874	167815	178964	181937	139944	154715	131288	171929	212245	182456	210209	125613	176929	138563	115645	154218	252941	179866	99029.6	185710	142867	173300	225844	81719.5	180742	185816	143832	205535	159483
YHL015W	RPS20	YIDLEAPVQIVK	113330	90198.5	99259.6	94871.5	113842	99228.4	85882.9	103863	94312.3	98407	91855.5	74828.2	116838	70371.6	110127	87228.9	79911.8	92306.7	80514.9	101067	100697	104545	108361	143520	88219.5	115733	110761	104531	114359	101534	105931	100033	92910.8	114125	118057	111879	70061.2	105973	100817	98325.7	104919	93351.1	92422.3	90814.9	86931.8	100014	93475.9
YKR057W	RPS21A	AIPGEYVTYALSGYVR	49256	NA	45181.5	38795	46981.1	46941.4	NA	38266.7	48643.3	39207.9	39451.2	NA	54961.1	NA	46595.4	NA	NA	45637.7	35707.4	NA	NA	36360.2	NA	40483	38067.1	NA	40886.8	38413.3	40610.4	40389.7	39421	NA	NA	46210.9	49620.8	42707.1	NA	NA	NA	48515.8	51147.7	NA	43671.1	46776.8	NA	54881.4	NA
YJL136C	RPS21B	AIPGEYITYALSGYVR	85832.1	76626.3	66710.7	60441.5	82572.4	81701	63557.4	61896.8	77049.5	58972.9	58832.7	42337	84195.3	46074	81465.1	64092.5	37342.4	84405.1	63015.1	54655.5	63288.6	25497.6	51225.1	62817	65667	NA	65935.6	68680.7	64352.2	50430	52815.6	69113.5	51652.7	74911.6	83828.7	55635.3	41851.8	94260.4	75444.9	71805.5	82675.4	NA	67751.8	66481.8	61364.5	86150.1	52108.7
YNL178W	RPS3	FADGFLIHSGQPVNDFIDTATR	132661	119246	132325	115961	134234	133355	102856	114677	118062	92543	101176	76981.6	146770	73616.1	140461	98601	80455.5	119791	109962	132371	143665	117915	116823	158644	108966	122424	130743	116577	135817	81058.8	117314	115880	91942.2	118580	135769	129307	62393.1	141429	129741	128403	116898	14889	108747	106245	78065.9	115561	79752.8
YLR167W	RPS31	LAVLSYYK	2024.57	NA	1919.55	3196	10506.3	9334.22	NA	6249.06	NA	NA	7716.55	2350.5	NA	NA	4626.13	NA	4388.82	NA	1450.24	NA	7358.6	NA	7767.34	12764.8	NA	7353.46	11258	9841.81	12996.6	NA	10383.6	NA	NA	NA	11938.7	12243.3	NA	8698.37	NA	7375.63	10163.8	NA	NA	1498.5	NA	NA	NA
YJR123W	RPS5	VNQAIALLTIGAR	107175	97565.3	102200	92553.5	110244	109598	77665.6	94249.1	111864	88433.9	88139	59908.4	100020	57889.6	112351	95478.5	76302.6	96736.2	81798.7	93724.9	92936.7	87492.5	83941.5	108404	82326.4	98955.4	85973.4	87913.3	90847.9	93559.9	85416.4	92850.5	97733.2	112930	102768	95396.3	59810	106860	92892.8	89191.1	93643.3	77885.3	89003.2	88272.4	84259.2	98963.3	90480.5
YOR096W	RPS7A	ILEDLVFPTEIVGK	126765	121071	118822	108080	141199	128193	99116.7	120187	116968	135135	104738	79428.2	134199	72934.9	136474	113834	87350.5	131369	103633	109776	128359	119430	127272	135622	100401	152653	148843	138384	132437	102739	134701	101568	99150.2	112803	157038	129209	76114.6	130558	109409	122890	138789	99812.2	134826	129966	108826	145544	102265
YNL096C	RPS7B	ILSQAPSELELQVAK	33571.4	34437.7	18428.2	35183	34324.1	30559.7	34984.5	29039.9	32564.3	13369.9	18322.1	28999.3	42004.4	33721.6	36392.6	32181.6	39691.3	28342.2	30085.4	33951.1	30344.5	35674.9	37157.6	38941.3	30024.8	37183.9	35405	NA	37593.1	37060.6	29756.9	NA	38733.4	39711.5	33960.7	44390.1	37789.6	4876.18	39418	4033.86	32904.9	36498.2	30141.3	5226.81	34819.1	31033	37809.9
YEL024W	RIP1	STVETFISSMTATADVLAMAK	NA	NA	6416.55	8675	NA	NA	NA	15995.4	NA	18800.5	NA	NA	NA	2892.28	17676.3	7066.58	NA	7086.7	5689.65	NA	4196.06	NA	NA	NA	NA	NA	NA	13252.3	6782.6	NA	9609.83	NA	NA	NA	6488.3	5017.12	3199.4	5037.16	NA	NA	NA	14151.4	9935.56	7384.53	13321.3	NA	NA
YCL037C	SRO9	LAPTEIPVSTISIEDLDATR	4833.93	NA	3937.55	6768.5	6792.24	5947.04	6201.22	9390.38	9132.56	7021.43	7068.13	4080.69	6740.81	NA	6022.43	5566.91	5041.33	6926.97	8634.37	NA	4133.58	5610.54	6413.83	3929.22	4708.18	NA	2847.74	3919.29	NA	5558.38	4281.98	NA	5399.34	8815.45	5210.65	7184.29	6660.82	7018.41	7154.28	6073.61	1272.98	NA	5281.15	4507.43	5313.83	3964.17	3603.34
YDL084W	SUB2	INLAINYDLTNEADQYLHR	15467.8	7119.27	6735.35	6920	14410.7	11197.9	11967.7	10821.1	12436.2	15244.1	9786.17	2442.22	NA	6454.12	5607.53	16737	NA	12289.8	6213.49	6051.9	14442.6	7121.9	21502.1	18578.7	6857.89	20596.7	12437.8	6096.42	16442.8	17084.2	13942	10540.4	NA	14248.6	13616.1	14948.8	8184.97	14937.4	6693.73	16035.6	10866.2	9813.23	6059.29	9864.03	12955.6	8755.12	8977.94
YOR341W	RPA190	NTIVNEINNVFSR	9168.6	4500.34	14322.9	7472	13885.1	6550.32	11725.5	12394.2	9671.52	15569.4	12366.5	9262.58	10145.4	10401.2	5628.81	8306.03	6611.23	8164.48	11756	8149.44	7579.82	12901.1	9260.44	8671.67	8204.4	9131.33	8452.63	7659.64	7255.73	12503.4	10864.1	10933.4	9741.51	8223.82	5738.12	9940.25	11236.3	7524.73	8502.36	11333.6	11712	NA	19186.3	16410.5	21214.2	11386.3	8554.38
YGR246C	BRF1	PILTQVLGEQ	20934.8	23215.3	25460.4	24304	39562.4	40535.4	31942.8	36102.9	22093.9	19665.2	40981.4	27700.4	27428.4	20262.4	31032.9	29523.6	36207.9	29388.9	22605	26771.1	27575.5	24613.2	42531.4	52018.5	25547.4	50867.1	47721.1	45449.4	58571.6	17037.6	44272	22411.3	24460.7	23260.7	53124.6	50793.8	22155.4	34452.5	27243.8	38992.1	25493.6	4548.16	20663.7	16572.4	8443.13	14405.6	8863.37
YIR034C	LYS1	LSVISIDHLPSLLPR	NA	NA	NA	NA	NA	NA	9678.31	NA	NA	NA	NA	26622.1	NA	30417.8	NA	4948.04	18380.2	NA	NA	NA	NA	NA	NA	NA	NA	NA	NA	NA	NA	NA	NA	NA	15225	NA	NA	NA	24465.6	NA	NA	NA	NA	20883.4	NA	NA	22661.3	NA	16622
YML008C	ERG6	EVTAALENAAVGLVAGGK	3262.32	4324.49	3448.93	6393	7157.12	4800.36	3738.67	4027.36	NA	3754.89	4957.06	4554.76	5251.21	NA	5817.64	NA	3949.63	4546.88	5915.79	NA	2634.95	5596.53	4227.7	2782.59	1518.92	5893.49	3867.59	7260	1381.87	5919.11	NA	2695.08	NA	10478.2	3831.1	NA	6345.43	8428.62	1638.16	NA	11709.5	11721.5	3793.58	2650.9	5055.38	4716.85	6547.34
YLR180W	SAM1	IDTVVVSAQHADEITTEDLR	28519.1	14471.3	20470.7	24066.5	10634.3	11352.6	33187.1	21638.2	9321.63	21294.3	28542.7	37515.7	19264.2	19166.1	19496	20944.1	40056.3	17674.1	11033.9	11051.2	19735.6	20051.7	20318.6	27317.1	26362.9	15302.9	13478	21540.5	11817.8	24721.1	25817.1	6935.76	31242.2	29604.4	26210	23953.8	49550.5	16346.6	26827.4	15642.5	19529.4	33398.7	10045.4	11674.8	36649.3	20884.2	25689.3
YDR502C	SAM2	SDDEIIEIIKK	5753.08	9467.89	3878.68	7126	3532.09	8161.14	56927.6	4521.66	9245.59	3920.07	15054.9	49037.7	9947.27	67217.6	6152.22	21106.5	55782.4	11533	2733.99	9610.22	8590.66	2817.82	5476.37	5099.92	17727.2	3088.18	10211.6	7191.17	2395.07	9845.08	5104.12	8663.39	38633	NA	8457.56	2956.78	65000.1	12500.4	5157.86	11812.3	19551.9	45092.3	2971.34	9015.69	44195.2	14596	40709.7
YJL080C	SCP160	APIEIPLEK	18570.3	14649.4	18818.3	16202.5	14807.7	17772.2	34463.9	17522.5	21304.7	19307.7	21378.9	27098.7	16627.7	13912.9	16697.6	16370.9	29002.1	16407	14407	15772.8	17425.2	12785	17422.8	NA	26422.7	15346.4	14025.1	19730.9	14840	18757.6	15544.7	26658.8	28409.4	21319.4	20257.5	19877.5	36566.4	22750.4	18013.4	17897.9	21712.3	27797	14996.2	13872.9	16280.8	11896.8	19599.7
YER008C	SEC3	VEKDLEISEGFILTMSKK	14226.5	15396.1	14417.2	10824.5	NA	19966.5	7565.15	35996	28693.5	3971.62	1789.17	NA	8826.36	NA	13053.9	9898.39	NA	21595.4	14116.3	11076.5	19010.5	4714.46	NA	7481.42	3355.53	7041.41	14323.4	16669.1	9716.85	NA	6747.94	4167.56	NA	2184.73	15381.6	NA	NA	8698.91	16573	12514.1	40014.3	NA	60478.8	62282.1	26210.2	46343.4	34068.7
YDR490C	PKH1	LINGLPDRCILK	6473.75	NA	3535.93	2904.5	2704.44	NA	NA	3613.96	2028.43	6745.94	NA	11981.8	NA	NA	2112.27	NA	NA	NA	8382.39	NA	NA	NA	1748.57	4240.07	1516.87	4385.22	NA	NA	2036.66	5651.69	3380.75	6549.62	2225.35	2318.68	6551	4455.25	NA	NA	NA	NA	NA	3040.39	NA	NA	NA	NA	NA
YBR263W	SHM1	LVSGGTDNHLIVIDLSGTQVDGAR	4665.98	11431.8	15223	16199.5	9265.79	16736.9	6936.75	10184.9	27637.6	11987.5	15139.3	NA	9916.01	NA	16944.4	14175.2	15008.2	13641.1	12758	15022.1	3574.24	10508.9	8198.27	9436.76	16368.9	13011.3	7703.63	16231.9	9249.98	22700.6	9584.52	20158.1	14894.5	30567	15626.9	8497.32	2051.79	1802.87	25371.2	10517.7	11019.1	5595.14	19179.5	18272	7593.8	18238.8	6621.5
YLR058C	SHM2	AVEFAQQVQQSLPK	6963.35	11846.1	5103.86	18549.5	7462.17	NA	15097.9	7345.54	2818.63	8899.43	11360.9	44375.1	9048.32	35773.1	3042.07	14247.1	24079.7	5894.1	NA	7793.6	21741.7	NA	5138.13	12389.8	16781.8	6482.04	14021	16579.7	NA	8921.06	15816.3	12182.3	19557.9	12126	16830.8	5148.3	52632.4	6031.32	13505	5012.94	7077.33	58594.8	3098.55	10331.3	32798.1	5216.62	22649.7
YDR023W	SES1	TAQLSEFDEELYK	121875	148155	126008	114286	105079	119531	NA	104614	144393	NA	NA	84032.5	144215	NA	114149	132827	61693.3	130185	185966	122156	NA	49987	NA	102589	108259	115691	103171	114764	36924	44633.2	94232.1	108064	107495	111116	110471	68797.3	126443	124237	150940	139239	158442	39193.2	193163	219365	182365	158381	210192
YPR028W	YOP1	ILQQLENK	3271.99	4296.03	NA	5820.5	NA	3334.83	4178.99	5082.72	2976.88	4149.56	7533.85	NA	2875.9	NA	NA	3589.42	1674.36	1887.64	4758.27	NA	NA	12331.4	5433.88	1946.31	1449.85	10469.8	3156.44	2540.52	4754.87	7692.63	6391.34	NA	NA	1589.91	4738.5	4946.62	NA	NA	NA	1355.08	NA	1952.59	5023.33	708.664	NA	3995.19	NA
YFR004W	RPN11	LIDTGALINNLEPR	2629.2	11698.1	8244.42	NA	2713.83	7942.75	NA	2423.75	17756	1776.56	3069.63	NA	6301.14	NA	10396.4	10980.7	NA	18585.6	11355.9	7363.41	4345.72	NA	NA	6487.71	4030.32	14851.3	5248.42	10419	2431.67	5415	3964.25	6601.18	7222.4	13095.1	6863.15	3822.45	NA	NA	19023.7	3916.32	10442	NA	7672.81	8725.64	8218.01	5130.45	5077.48
YHL034C	SBP1	GMAFVTFSGENVDIEAK	1776.21	NA	NA	NA	NA	3235.3	3206.8	NA	NA	3295.37	NA	1819.43	NA	NA	NA	4923.86	2722.64	NA	NA	NA	NA	NA	6752.07	NA	NA	8386.74	NA	NA	5381.98	NA	NA	NA	2608.3	NA	NA	NA	1764.59	NA	NA	3342.34	NA	NA	NA	NA	NA	NA	NA
YOR007C	SGT2	VLPTNAIYYANR	7863.16	8036.07	5269.51	4970.5	4323.15	6464.95	11014.8	5827.26	7979.11	5602.4	8664.87	11753.8	7286.43	8896.96	5980.41	8817.24	15031.5	7151.51	6740.81	6917.24	7793.98	6644.97	8997.24	9763.65	7221.12	8048.69	5051.93	6058.79	6750.02	6386.82	4809.43	10385.2	12601.2	5886	8011.7	9878.72	14219.2	9954.66	6681.14	9245.35	8829.12	7941.08	5353.24	4352.93	9164.16	3210.2	7659.25
YJL026W	RNR2	ESEFLFNAIHTIPEIGEK	37135.5	43817.4	29017.2	27616.5	63522.2	45868.3	39152.9	34786.7	40483.8	12255.8	13636.3	36584.3	30978.6	32164.8	55895	30687.6	8707.17	52360.5	59394.4	35632.2	76316.2	12525.2	9685.3	28707.4	28281.8	26078.9	52079.5	54861.8	31961.6	7524.21	37139.9	30296.6	11695.6	25075.4	59019	23032.1	11554.6	43668	56787.8	53956.7	73496.3	NA	71146.3	74310.9	31135.5	49984.9	58302.4
YGR279C	SCW4	LYGTDCNQVENVFK	23565	26333.9	23512.8	24741.5	22291.1	2615.51	1501.57	14705.7	48319.1	6204.38	8327.61	NA	19736.1	NA	15661.9	31693.4	1476.15	32682.9	17996.9	NA	30067.8	NA	NA	24481.3	14287.2	17025	14026.4	33798.9	19106.1	NA	16625.3	22181.4	NA	21636.8	39568.8	NA	3787.59	23023.4	NA	15470.2	28377.5	NA	33388.6	36059.1	13984.4	46087.1	15178.7
YGR175C	ERG1	NITAQEPNVTR	NA	3461.18	3657.3	2331.5	14687.5	15333.1	1898.92	12004.7	NA	NA	6274.37	6894.73	NA	NA	2125.03	NA	NA	NA	NA	17358.7	10518.1	17492.4	NA	13388.5	NA	11067.3	10098.4	8820.01	13531.7	NA	10377.3	NA	NA	NA	12922.6	8490.91	NA	NA	NA	NA	NA	NA	NA	NA	NA	NA	NA
YOR261C	RPN8	TFLHLPCTIEAEEAEEIGVEHLLR	NA	NA	NA	4764.5	NA	NA	NA	1751.72	8666.56	1698.96	NA	NA	1295.19	NA	7811.82	19068.5	6397.93	16603	6095.2	NA	NA	NA	NA	NA	NA	18102.4	1940.55	6729.14	NA	NA	1552.52	NA	7960.86	7796.44	7642.38	NA	NA	NA	10098.6	2858.5	NA	NA	4512.35	3235.96	1463.96	4398.46	NA
YHR051W	COX6	VLNNCFSYDLVPAPAVIEK	2101.42	2232.53	1540.85	1839.5	2344.51	6487.59	14079.6	NA	4660.56	NA	1789.68	3654.96	1651.7	NA	3410.69	5003.31	3712.41	4491.76	1332.46	NA	4711.56	NA	6984.37	NA	1548.08	8348.53	NA	NA	NA	6658.22	1357.72	4419.55	1753.21	NA	1719.82	NA	3825.97	5255.24	NA	13364.2	NA	NA	NA	NA	1908.27	NA	2480.03
YDR353W	TRR1	IVAGQVDTDEAGYIK	74397.2	72451	85498.8	103486	76380.4	78269	81306.5	109668	75693.6	254709	123856	95130	106869	140450	123682	156370	198859	77197.4	63517.5	100862	35124.1	212359	87568.3	79695	62270.5	150640	126835	78214.2	184072	202870	176328	51878.3	127464	113439	76914.8	130769	153715	97540.4	75757	60955.8	53385.8	286583	109230	66708.8	114454	84579.2	107218
YLR043C	TRX1	NEVSAMPTLLLFK	16363	11471.1	12177.3	9768.5	15166.1	13974.7	11307.6	11124.4	8308.96	11947.6	10670	7498.31	9124.07	7905.15	9934.72	12353.1	10782.3	12389.3	11231.7	9219.69	9981.96	13759.3	13750.2	7540.58	11526.2	13158.9	10313.9	6930.56	10051.6	10173.4	7745.9	12811.5	16305.3	8637.37	8036.6	7313.76	7550	9190.55	10711.7	11834	17014.5	10979.7	12838.2	10868.5	15090.8	15000.2	14096.8
YGR209C	TRX2	AEVSSMPTLIFYK	27968.4	16180.3	14645.9	14086	11954.4	11564.4	25902.2	18868.3	13681.1	18604.8	16292.9	26063.1	16032.8	25331.6	10777.8	20989.6	17890.7	17409.8	22260.1	14924.6	15607.6	19584.1	20224.8	16432.4	23175.6	25590.1	14281	10336.9	13957.5	21859.7	15502.6	26515.2	31913.9	13350.7	9441.05	12887.2	24843.9	19137.6	20748.9	19787	19856.2	32354.1	14407.2	13114	32662	14343.6	22271.8
YML028W	TSA1	HITINDLPVGR	76173.9	75477.4	62335.6	83470.5	66838.7	61093	73846.6	64557.1	76705.8	62681.3	75525.3	89009.9	46439.8	75490.2	58297.7	75231.5	89535.8	101308	72976.4	60267.3	66923.3	47722	87615.2	43028.9	78758.1	70813.7	51388.6	52417.2	51107.4	98565.8	54426.9	106989	88093.4	99671.9	64263.8	41225.3	109849	76695.6	63897	81638	74925.2	74319.7	50136.2	76887.6	79122.1	78062.8	95372.6
YJR043C	POL32	QETPSSNKRLK	36448.4	47709.4	45810.8	42906	41571.7	45764.1	40205.5	39786.8	51048.8	45370.2	50145.8	36365.6	41134.6	34268.3	51267.3	50370.4	52051.1	50490.8	38526.9	52756.8	39462.7	49703.9	53096.2	32314.2	41640.5	41210.4	33804.2	33945.8	40985.7	48502.2	33695	34489.9	45834.8	49273.8	33921.6	42038.4	35793	35739.2	38680.5	48055.4	51505.2	32679.4	33514.6	29363.8	25927.6	34894.2	20327
YEL046C	GLY1	LAISEAFDYAK	9906.05	9056.44	3569.79	3438	4292.99	5362.14	11765.9	7208.48	3452.65	5158.4	7165.88	18792.9	4885.7	17541.4	7832.03	8941.02	16998.4	6694.78	2446.23	3502.69	9063.83	5580.18	NA	4123.25	NA	6615.25	4571.97	6578.64	6230.48	3081.03	4995.19	8265.67	10824.9	1333.69	8577.45	5328.18	15371.6	6382.65	5398.62	5258.28	7623.83	21194.6	5016.55	NA	13304.4	8021.4	18530.6
YER086W	ILV1	TPLPVVGTFADGTSVR	21021.4	18655.8	NA	NA	11516.4	NA	5260.17	NA	NA	NA	9652.09	5821.42	NA	4184.32	NA	17167.6	8868.88	NA	NA	NA	NA	14133.5	7277.91	NA	NA	NA	NA	NA	NA	NA	NA	14344.5	NA	7302.09	NA	NA	6504.92	11903.3	NA	NA	15844.8	10218.4	NA	NA	2749.38	NA	NA
YCR053W	THR4	LSFQDLAFAIMR	108379	91539.3	99454.4	87202	95984.3	94882.3	82284.3	80714.2	80974.9	97239.1	78587.2	63029.8	109155	60023.6	112117	80383.4	68804.1	99510.3	82189.3	80260.5	95385.7	94026	67355.2	101816	75657.8	111803	112575	107568	114101	81428.6	92266.9	88667.7	76604.9	93618.9	131858	100201	59714.7	121828	94638.5	93186.1	106192	73944.1	88119.9	83841.2	80477.3	91678.2	75135.9
YLL028W	TPO1	YTTATEGNGGADLAIQR	NA	3238.1	3298.39	1753	4187.18	6793.72	9368.16	9798.03	5989.73	8806.31	8135.7	7826.13	7626.52	7379.89	1708.54	4204.83	12351.6	4639.24	3917.85	3659.67	NA	16702.6	9944.09	7142.49	5961.58	10700.6	9398.57	8248.31	13481.3	2736.8	10833.3	NA	8468.55	1826.45	5606.72	8078.16	6342.44	8299.18	NA	8129.91	NA	NA	NA	NA	NA	NA	NA
YLR354C	TAL1	ASGTVVVADTGDFGSIAK	17718.8	9516.83	18555.3	13116.5	19645.5	11293.1	22044	16914.1	15619.6	18895.8	27011.5	21953.3	14391.7	19865	11147.5	21623.4	22476.4	24508.7	13368.3	19554.8	19786.5	25954.7	38149.2	15916.9	14965.1	47981.6	19867.5	13682.6	22588	28907.1	21092.2	23917.4	32195.2	15343	18840.6	17281.4	29792.3	16410.7	11902.5	21634.5	12791.9	17462.1	18950.5	14710.1	21167.2	16794.6	22351.7
YOR230W	WTM1	IIDNAGKPGEILR	1041.3	NA	NA	NA	NA	NA	1601.22	1165.45	NA	1465.59	1124.88	10548.5	NA	8935.48	NA	2838.72	7940.15	NA	2843.33	NA	NA	NA	NA	NA	3422.55	1147.92	NA	NA	908.305	995.148	NA	1721.84	2902.06	751.631	NA	NA	9178.48	1245.42	NA	NA	NA	10362.7	1048.26	NA	9513.48	NA	4409.11
YAL003W	EFB1	AFQSAYPEFSR	80369.1	72159	79368.7	69452.5	80007.4	69441.4	61504.6	71762.4	72413.6	70012.6	89554.6	48486.8	83955.8	45446.7	91587	77313.8	70142.5	87027	77054.3	70301.1	86508.3	63868.8	79309.9	72317.9	93239.7	69801.1	66112.2	69901.2	75243.8	72632.7	74445.7	86824.8	80838.5	96759.9	87739.1	80259	57428.5	104426	73991.4	88561.2	74869.5	52095.3	62442.2	62916.6	55615.1	66134.9	53691.3
YKL081W	TEF4	WFNTVAASPIVK	34179	32029.3	37805.5	32831.5	31625.6	34207.7	25705.4	31149.8	33432.6	29659.4	28396.4	20640.2	36646.7	21519	35846.8	27696.4	27396.3	31230.1	30328.9	36048.7	35690	25847.8	25940.6	37695.4	35355.6	25868.2	29572.9	33474.1	26880.9	31199	28312	42780.3	31038.9	38935.4	31981.3	29271.3	23301.2	39556	42875.3	27572.9	36794.5	24643.7	28250	30369.6	26589.2	26225.7	24593.1
YNL244C	SUI1	SFDPFADTGDDETATSNYIHIR	4646.64	5342.01	5896.68	4832	2416.2	4401.32	NA	5218.45	3850.32	2563.68	4317.34	4658.25	8357.55	2960.15	4985.71	3864.02	1506.99	5833.37	3075.93	4568.53	5959.24	2977.77	4448.96	2147.36	5621.38	4354.44	5599.48	4903.47	5745.31	3275.06	4829.77	4299.08	NA	5446.93	4870.83	5326.48	NA	5077.4	6012.87	5909.86	NA	NA	6119.93	4179.88	NA	2681.55	NA
YJR007W	SUI2	AVTATEDAELQALLESK	NA	NA	NA	NA	NA	NA	NA	NA	NA	NA	NA	NA	2981.85	NA	NA	2139.26	NA	2910.31	NA	NA	NA	NA	NA	1760.3	NA	2503.87	2009.96	NA	NA	NA	NA	NA	NA	NA	NA	NA	NA	NA	NA	NA	NA	7910.92	NA	NA	8751.82	3599.68	7774.29
YMR012W	CLU1	ISELEIVSR	17633.3	36258.2	36084.4	31826	31391.8	37034.5	31318.1	34976.8	25739.7	30735.9	42026	25469.5	34483.3	26571	33931.9	39107.1	37058.6	31042.8	28395.1	37910.4	19797.1	19327.8	43079.3	15608.1	30318	20769.2	23964	22368.2	24917.5	35904.4	24754.1	23129.4	33187.5	37509.2	26065.7	28523.5	25896.2	28220.5	28425.1	33157.5	43126.3	28113.5	37828.5	31945.5	25050.9	36567.6	24638.2
YEL034W	HYP2	KLEDLSPSTHNMEVPVVK	54884.3	105813	56786.8	96206	94203.4	76146.4	97462	37514.2	59638.3	32537.4	79849.8	45037.6	90639.4	86981.1	73472.9	39696.6	NA	92031.7	59386.5	NA	97620.5	NA	103607	48642.3	NA	86488.1	50267.8	74878	47642	54497	38200.7	55900.1	43873.3	80069.4	84181.9	45405.4	96690.7	109712	38924.4	90887.9	54029.6	76375.8	81436.8	80050.6	29433.6	71570	81258.7
YDR050C	TPI1	ILYGGSANGSNAVTFK	137272	94130.9	84253.3	98913.5	107004	74182.3	154606	98085.1	89096.8	129392	162750	149570	140252	156502	93799.8	91835	NA	110478	125971	104189	139476	123232	151373	110228	152684	106653	124315	107288	99510	153661	136027	181431	142278	136003	112490	147066	177931	146146	108020	139249	134231	169963	133970	136434	155069	127468	153540
YNL079C	TPM1	NHQLEEEIEKLEAELAESK	NA	NA	5403.38	4711.5	NA	NA	2205.33	5296.27	6376.09	14759	2653.04	NA	2034.69	NA	2877.7	5687.8	NA	3448.69	5397.91	5806.23	4206.64	6570.83	3359.21	5366.15	NA	9338.3	6123.15	5065.43	4155.44	NA	6592.46	NA	NA	NA	6320.93	3595.56	4064	3282.15	1449.84	NA	15895.9	11795.4	23308.9	21317.2	40798.7	46363.2	21822.6
YIL138C	TPM2	NEQLDSEVEKLESQLSDTK	58175.2	50644.7	NA	48335.5	59666.7	NA	43391.7	NA	NA	NA	56176.1	NA	NA	NA	38959.6	NA	63304.8	40891.8	58071.4	NA	33128.6	NA	NA	31079.8	NA	NA	NA	NA	NA	NA	NA	62497.6	65594.8	NA	NA	25260.8	42643.3	32463.1	NA	NA	20518.6	14111.8	NA	NA	1815.11	NA	NA
YGL026C	TRP5	MGTTGVQSSVASDLDELISR	35861.1	26138.7	27066.9	27405	36937.1	35857.7	13869.1	33127.4	37166.3	37083.3	23415.8	9419.37	16690.7	12086.4	46350.7	45512.8	15781.5	32251.2	31140	19207.8	26654.3	17578.8	22664.2	33650.8	23434.5	41678.5	37917.4	42268.4	36105.9	NA	36921.1	28998.8	NA	29643.7	43485.7	37932.7	12347.9	24054	37021.9	24548.3	15547	NA	14890.6	14319.1	12310.8	16909.6	11936.2
YGR185C	TYS1	IGVADAINELLEPIR	4611.02	22581.3	23686.7	23310.5	NA	38228.4	11222.2	25633.3	58919.5	21434	14224.8	4955.7	13337.5	3361.89	23515.2	20454.2	16173.5	37315.5	21167.2	9133.76	11596	4458.19	7129.48	7456.35	11487.8	13002.3	10422.9	28156.8	11340.2	9941.24	14839.1	NA	12956	15884.7	24887.6	12500.1	2739.51	10926	20198.2	18843.3	22890	6482.41	48683.4	51611	33585.8	27311	17834.7
YEL026W	SNU13	ACGVSRPVIAASITTNDASAIK	8428.59	9920.88	NA	7945	NA	6487.12	10803.1	6095.19	10733	6030.33	10487.8	7642.7	NA	3707.98	11577.8	NA	11762.7	12300	6479.88	9142.57	8863.78	7166.27	9872.36	NA	10769	10475.6	4147	8666.3	8819.26	7916.81	NA	10239.5	9979.76	11572.7	12024.5	10272.2	10164.8	15915.3	10424.8	8484.8	8347.3	9171.43	7290.32	5611.63	NA	6243.32	7226.18
YKL210W	UBA1	VEVLGPFAFR	2859.75	NA	NA	7156	NA	7349.36	5773.35	1742.43	NA	3090.27	12182.3	NA	7058.12	NA	9511.85	NA	NA	NA	6857.1	NA	NA	NA	3750.41	2763.04	11396.7	6808.43	NA	10107.9	1641.64	16856.1	3578.26	12526.3	NA	23031	5622.39	NA	NA	1968.2	23779.8	4511.99	7827.89	NA	14713.4	9669.97	NA	5460.05	NA
YDR510W	SMT3	IQADQTPEDLDMEDNDIIEAHR	NA	NA	NA	NA	NA	NA	2483.73	2251.76	NA	NA	3318.35	NA	NA	NA	NA	1548.6	2759.14	1949.39	NA	NA	NA	NA	4239.29	NA	3377.53	NA	NA	NA	1302.42	3314.32	NA	NA	4290.41	2268.71	NA	NA	NA	NA	1934	2418.6	NA	NA	1930.71	1952.12	2766.74	NA	1526.43
YML021C	UNG1	YPNIMVMK	NA	NA	NA	NA	NA	NA	21810.5	NA	NA	NA	NA	25221	NA	27491.3	NA	11439.5	41655.7	NA	9526.98	NA	NA	NA	NA	NA	4937.38	NA	NA	NA	NA	NA	NA	NA	18620.5	NA	NA	NA	31740.4	NA	NA	NA	NA	36935.9	1340.43	NA	15655.2	NA	17273.7
YKL035W	UGP1	EILFVSNGDNLGATVDLK	244268	240680	176965	163832	201421	165550	234141	159191	144176	166734	100889	167828	151533	165030	123892	139744	96243.9	223156	285265	160668	255412	162877	119470	124131	218695	121644	115905	114189	88175.2	122670	118752	195572	191724	121710	97525	100418	164402	137926	154384	216951	252756	109844	180887	264956	151619	299427	351304
YBR127C	VMA2	IPIFSASGLPHNEIAAQICR	21316.5	15472.3	14893.8	17376	13150.9	14453	18278.6	18405.8	19650.8	24321.4	19762.2	15738.4	20307.2	15544.9	14299.7	18541.8	17129.9	15001.1	18943.1	19215.5	14090.3	23110	16682.9	21572.9	18851.2	20683.2	14203.5	17307.8	15020.7	22563.5	19982.6	27338	21182.6	17984.9	16833.5	20208.6	19942.9	23246.4	25690.1	18586	17655.2	17949.5	20446.6	16023.6	23507	14168.6	16510.3
YKL080W	VMA5	IIEILQGLNETSTNAYR	400497	305614	NA	277446	369455	NA	NA	NA	NA	NA	138916	NA	NA	NA	257684	NA	NA	324546	NA	NA	136395	NA	NA	NA	NA	2405.69	NA	NA	NA	2025	NA	270865	58212.7	NA	NA	156027	54549.3	282832	1887.32	NA	242450	NA	NA	NA	NA	NA	NA
YOR332W	VMA4	LLSEEALPAIR	16113.6	14518	15469.9	14673	16444.2	15639.7	12845.9	20306.6	17992.3	23782.6	20426.5	11374.5	21080.1	11560.5	19210.4	15799.8	17947.9	16710.7	13391.7	18156.3	14050.5	25492.3	27178.8	25207.3	17000.2	25010.6	21213.1	17769.9	23519.1	24872.5	21984.8	18440.5	18676	23318.1	19410.5	26992.6	13095.6	18959.8	21725.6	16935.9	15976.6	19558.4	17452.3	14546.6	10718.1	15008.3	10131.7
YDR495C	VPS3	LKHSLQCENFSK	25702.1	31496.1	29156.3	25966.5	30142.9	31334.2	24618	27202.4	22841.9	24034.3	24558.1	19081.7	29165.9	19265.7	26605.7	29554.7	21890	27444.1	23957.4	31510.4	28056.7	14918.6	24049.1	17509.3	27566.1	18479.7	16949.9	17869	17206.9	27567.7	15255	28713.1	27746.4	31750.3	22268.3	16920.3	19237.8	27903.9	24222.5	27280.7	30815.2	20572.9	21866.7	23331.9	23246.2	26804.3	22637.8
YPL154C	PEP4	FDGILGLGYDTISVDK	9355.89	3808.9	NA	1344	1606.84	3075.4	16705.4	10895.4	6368.39	12529.6	7324.53	17436.4	4685.99	18913.5	NA	11966.8	11495.9	4315.71	14690.8	3629.38	NA	11163.3	9934.16	2355.93	8879.19	14997.7	NA	NA	5984.1	11153.2	6115.18	7311.9	17657.5	NA	1467.61	4935.94	12718.4	3783.58	4640.65	11543.6	3737.21	24159.8	12793.7	6927.19	25740.4	12846	12031.7
YER091C	MET6	LDEVVVITK	211148	388219	357057	401568	445057	374693	361523	421159	397509	468869	557314	401861	426095	373314	409667	410363	378581	422068	430847	460570	448508	464746	532194	412666	452616	397914	411862	408312	410612	481813	449108	455304	407766	432858	433164	499220	459244	451614	358739	463793	448390	320944	319920	322940	327570	299892	272184
YBR168W	PEX32	FIPVETEASHFLPFTKILR	29410.8	46580.9	41062.7	37443	27953.1	30556.4	37034.8	27021.6	37143.2	31835.6	39594.5	33526.8	46302.6	31928.2	47198.6	44226.7	44761	49006.8	38737.1	45236.9	36460.4	38777	48896.6	39419.6	35703.5	46694.7	34046.2	38655.6	36455.4	39825.8	32792.8	33604.5	44291.8	48249.5	49038	43516.8	37807	49052.7	42213.3	39369.2	38803.5	32876.4	30194.3	30261.6	28740.4	36063.1	31356.2
YDL019C	OSH2	IAEDLNQVSKPLLKVK	126145	63408.2	96583.7	89135.5	151154	105515	28096.4	110242	73392.9	103268	81181.4	33837.8	59488.1	27583.6	127701	63167.4	44965.5	73378.8	78161.6	72999	112538	102112	117763	116300	80439.2	73741.6	141474	102069	131364	73624.5	112706	84845.7	50331.7	64301.6	136637	149465	17997.2	58217.2	77481.2	73698.6	58637.7	27116.2	65229.5	59995.4	23113.8	58747.7	27275.1
YDL124W	YDL124W	NIGVSNFAVEDLQR	3208.88	4470.74	2241.99	1296.5	1513.4	5367.8	14198.6	NA	2458.98	NA	1428.37	22033.3	NA	23313.1	NA	6591.06	25765.4	NA	7789.97	3021.27	4635.47	NA	4356.81	3993.4	7065.6	5632.91	2110	1755.93	1897.4	7153.23	3561.54	4858.82	16778.7	2354.83	3145.94	6022.94	20926.8	2208.58	NA	NA	NA	17784.5	NA	NA	19589.1	3554.44	16337.2
YDR233C	RTN1	LAADVPLEPESK	NA	5508.76	3673.97	3242	2080.98	5302.24	9957.32	5483.73	1960.1	9350.08	8703.25	14030.5	6532.1	13209.7	7027.23	11165.5	22623	5955.85	3122.65	6385.7	NA	11610.4	14777.1	5450.38	4846.82	11621.9	8676.16	5921.6	8428.26	11645.9	9394.69	NA	9032.37	8397.64	3784.53	10394.4	15078.4	4614.58	2349.96	NA	NA	17298.8	5817.16	NA	4657.19	NA	NA
YDR341C	YDR341C	LVIPDILTR	3048.56	4892.44	3229.11	4869	2621.38	2648.53	10317.9	3707.25	3668.44	4236.03	2370.54	17376.3	3763.2	17376.3	5014.97	2680.41	12910.4	4111.58	2603.28	1429.94	3186.73	NA	1833	4549.42	3901.4	3366.27	2547.6	4223.49	1198.43	3279.61	3263.24	2851.32	7179.99	4335.96	2286.49	3093.51	16220.6	NA	3051.81	2088.82	4442.14	25047.1	4365.2	4030.73	19601.4	5527.69	14671.5
YDR470C	UGO1	LPVDLIR	4580.99	3314.36	1796.09	1010.5	2966.48	2602.77	5197.89	1436.48	1365.13	1171.81	1196.53	NA	3591.04	2689.88	NA	3025.24	973.406	3524.21	2383.61	2982.16	5053.21	1727.94	2947.03	4744.95	3437.39	2503.34	2783.74	1756.38	1326.53	1818.46	NA	4207.54	2469.21	1530.9	2552.99	971.208	2085.96	4246.94	1733.62	6071.33	9673.93	4483.09	4378.35	4319.14	4205.58	3374.35	3232.55
YDR533C	HSP31	TGVFVVEALHPFNTFR	33899.1	NA	21493.2	NA	NA	21540.6	NA	31313.8	36753.2	50620.1	35218.3	NA	NA	31316.7	30229.2	NA	35214.4	NA	26298.7	NA	NA	42130.7	NA	23672.6	NA	NA	NA	NA	NA	NA	NA	NA	NA	46480.4	NA	NA	31233.7	31122.5	NA	NA	NA	40227.7	NA	NA	57901	23757.4	NA
YNL064C	YDJ1	HEISASLEELYK	11998.8	13412.2	14902.1	13598	11304.7	15033.6	11619.6	10369.3	17968.2	8086.81	14652.1	10176	16585.3	9071.23	17502.4	19585.5	19466.2	23263.6	11306.2	16682.8	15330.5	10127.1	17683.8	16916.2	13631.9	26167	13208.5	17454.2	16592.3	10577.4	13761.2	13408	19135	16033	22208.8	16226	7932.54	17693.7	16558.9	17632	17192	11142.4	11894.3	12315.5	6943.1	15031.6	8619.03
YER036C	ARB1	TILEDGPESELLEPLYER	7738.98	5987.93	NA	6150.5	10351.5	4731.5	NA	8931.9	8253.99	7856.78	7643.88	2070.4	9288.81	3302.58	9198.54	8842	4825.5	9011.6	8025.05	NA	2788.14	NA	7444	NA	NA	6044.74	6783.83	4685.99	6319.3	7891.77	5635.19	5426.98	6827.6	9144.48	5870.45	7405.19	2214.88	NA	8590.48	9170.04	NA	NA	5454.59	5038.52	5812.47	7296.72	3228.75
YFR044C	DUG1	AIQIPAVSSDESLR	NA	NA	NA	NA	NA	NA	NA	1061.55	1598.39	NA	1734.41	4482.88	14339.3	3816.83	NA	NA	1803.35	NA	NA	NA	NA	NA	NA	NA	NA	NA	NA	1696.74	NA	1120.89	NA	NA	NA	NA	NA	NA	NA	NA	NA	2815.71	NA	1639.68	2450.18	2682.62	NA	3520.4	11487.9
YGL160W	YGL160W	LIGLALLRAFGRR	38132.5	24578.3	NA	10334	17563.5	5103.19	44525.8	19086.7	13793.6	23574.2	18814.9	13024.1	16909.5	15706.3	12050.2	42957.3	3171.28	18788.1	44875.1	21559.2	42958.9	14995.7	19697.3	12517.2	67931.3	45502.7	23973.9	19616.6	NA	24922	17961.8	24269.9	41171.4	13074.9	15631.9	7038.59	11634.4	13191.1	18801.8	38460.3	35588.2	8367.57	22518.9	33574.6	37916.5	50195.1	47980.6
YGL245W	GUS1	APIVAYAELIAAR	13032.5	13389.5	11325.6	12573.5	12200.1	10268.2	11012.3	11281.8	12308.3	14845	11560.5	11095	12556.2	13248.8	11109.7	11839	12502.6	11130.9	11660.1	10313.6	12663.8	15214.6	10309.9	12018.8	10728.1	10313.2	10619.9	10903.1	9891.37	13136.6	11255	14696.4	11574.6	13833.9	10961.2	12353.1	14468.6	13017.1	11895.1	10705.4	13998.2	16618.6	13932.3	13735.3	16983.1	10259.6	15005.2
YNL160W	YGP1	NAVGAGYLSPIK	7815.83	3948.89	NA	1630.5	7035	4153.21	7652.34	NA	3219.9	5126.8	3450.9	3196.39	8987.93	2560.86	2886.21	2976.31	2643.99	5659.87	1648.05	9730.85	13007.9	5980.06	17204.9	13528.4	4587.45	NA	1329.91	8424.5	3090.02	3839.49	2929.68	3437.37	3825.13	3197.89	3479.3	5435.01	2147.12	12143.1	4497.98	12465.6	13699.9	13202.6	3647.28	8161.59	2580.43	8184.25	3005.32
YGR086C	PIL1	SAAGAFGPELSR	14516.1	22242.7	25146.3	23119.5	15887	18824.6	NA	20098.8	20944.5	32765.8	26992.6	23070	21873.6	22915	30708.4	29699.8	32404.9	21098.8	NA	29221.7	13987.5	25989.1	34456.7	23599.9	10119.8	NA	28300.3	23858	32107.6	29068.7	26876.5	15408.2	NA	29076	26392.6	38064.7	22889.8	21431	21163.3	NA	11786.7	19092.9	15369.8	14087.6	15197.2	NA	16499.3
YGR198W	YPP1	TAMFLFQNLSDNSNDEIKKKT	NA	24735.3	28161.9	17660.5	19992.1	17282.2	2142.43	7570.14	14809.9	2447.27	1221.1	NA	10033.6	8113.05	29206.8	9069.4	NA	13351.3	23782.4	13598.2	39320.6	NA	NA	11243.7	6254.73	8544.36	21276.2	26220.5	10212.3	NA	12748.8	4881.44	NA	2438.28	20132.1	NA	NA	NA	13826	24111.3	3266.93	4758.74	70369	153637	58758.1	109711	137912
YGR207C	YGR207C	GIDTCSLIDSVGKENIEPLAIAK	NA	NA	NA	NA	NA	1957.03	17440.9	NA	1447.85	NA	NA	32443.5	2058.53	40093.8	NA	NA	27748.1	NA	NA	NA	NA	NA	NA	2202.01	NA	NA	NA	NA	NA	NA	NA	NA	14316.9	NA	NA	NA	33123.6	1920.88	NA	NA	NA	39564.6	NA	NA	26310.7	NA	26909.1
YGR234W	YHB1	VGAQPNALATTVLAAAK	NA	22151.1	2095.09	10521.5	10283.8	9597.43	37746.7	NA	15357.6	NA	6394.64	17692.9	17309.5	15650.7	21536	NA	54405	17258.7	2709.14	NA	10336.2	NA	13753.5	4561.45	1748.11	2931.09	NA	22077.3	NA	6567.18	NA	NA	NA	26203.4	12250.4	NA	19972.3	27981.7	NA	NA	NA	118076	4181.16	11667.8	NA	5675.04	15836.7
YJL171C	YJL171C	LDFTNVGFTGSYVDVNK	7498.76	11944	6533.23	NA	NA	NA	NA	5651.3	NA	9393.88	NA	19294.8	5688.77	NA	NA	4290.03	NA	NA	NA	NA	NA	10547.4	9066.21	NA	NA	NA	NA	12186.4	6854.46	14020.3	5213.04	9954.9	NA	NA	6702.24	4375.35	10025.7	NA	6736.74	NA	NA	1804.12	NA	NA	NA	4649.64	9011.69
YJR105W	ADO1	TVIFTHGVEPTVVVSSK	496165	486491	503729	528398	522766	529617	461765	512147	564402	537634	558597	367194	373939	334773	536754	641284	568884	572674	531391	449598	192460	528597	625159	625307	465786	699291	565504	607813	717923	461485	616616	498371	532354	469676	715427	714658	410061	500231	501045	561807	500605	317689	411020	404993	368849	451919	327633
YKL056C	TMA19	DIFSNDELLSDAYDAK	30756.4	27297.4	31069.6	30069.5	39783.4	43132.5	43577.9	40273.6	30157.2	31739.7	37382.1	29060	42399.6	29936	42589.5	44430.5	35043.9	41575.6	31214.6	16020.7	24914.8	23187.6	38291.5	29565.7	36153.7	40084.2	41784.1	37605.3	39028.1	27686.6	39331.5	29081.9	41947.9	37070.7	44687.3	42094.4	28207	41393.7	37401.7	38601.8	36309.2	43073.5	50867.3	45218.1	54705.9	51268.3	52037.4
YKR046C	PET10	LDELVNLLVFK	11647.1	6020.93	14065.6	14083.5	13375.8	9669.12	NA	9798.03	6553.87	6720.44	5377.74	NA	NA	NA	11528.9	6446.56	NA	9027.42	11150.7	NA	NA	2534.7	4519.59	NA	4486.15	NA	4574.68	NA	5606.05	4991.67	5589.54	9610.84	5694.35	9297.04	3285.65	4281.78	NA	5508.68	NA	4263.79	NA	NA	NA	2956.2	NA	5269.18	1944.76
YLR179C	YLR179C	YVFFLCK	19698.6	NA	NA	10454	NA	11760.6	12808.5	NA	NA	16664.7	NA	14562.8	NA	14619.1	NA	3912.38	5822.82	NA	NA	NA	5695.19	12649.5	9174.91	11026.1	12185.6	3889.01	NA	7266.88	1172.09	13237.4	NA	14518.1	18722.1	NA	4473.85	NA	15062.8	6963.48	14945.4	NA	NA	NA	5394.8	NA	11545	10859.8	8745.48
YLR432W	IMD3	LDGLSVQELMDSK	22212.3	12960.4	12773.2	14398.5	10608.1	17564.2	23844.5	19822.4	21566.7	28363.4	22535	19144.2	19923.7	21217	15229	24805.8	27388.1	18898.9	15610.3	19913.4	16744.9	22423.5	29792.5	27044.3	22405.7	31820.1	26591.4	22058	26265.4	27418.6	24707	29186.1	28694.4	24212.2	22232.7	25956.8	21746.4	16052.9	28630.2	16817.8	14417.9	28227.1	19478.4	17828.7	24298.3	14733.9	18204.5
YMR110C	HFD1	LMNDILHLIEILPK	NA	NA	19227.3	NA	NA	NA	NA	NA	NA	NA	NA	NA	NA	NA	NA	3052.3	NA	NA	NA	8206.17	14848.2	6031.43	NA	NA	NA	NA	3329.05	12509.9	9298.63	NA	8100.69	NA	NA	NA	NA	NA	NA	NA	NA	NA	NA	NA	106950	110507	31433.2	39908.8	22354
YMR226C	YMR226C	NSGDIVNLGSIAGR	37237.8	14008.1	20539.4	17387.5	15133	18810.9	18519	20329.1	21137.2	30596.8	25132.8	31949	40056.6	49706.8	16622.1	18373.1	21929.6	15750.3	28962.6	20135.9	24600.9	30088.9	33234.5	27145.1	27726.3	29924.4	24004.5	15131.2	25666	37961.3	28384.7	43890.9	24184.4	17570.8	11967.8	30731.3	30739.6	17819.3	24410.8	24717.2	21933.4	57479.8	32628.3	26277.8	18462.6	26013.3	18930.9
YMR315W	YMR315W	SPLNVGIVGTGIFAR	3366.65	NA	NA	NA	NA	NA	2312.46	2038.66	NA	5374.03	1592.65	17081.3	NA	1961	NA	NA	19135.3	NA	4657.38	NA	2714.06	5045.46	2740.67	1751.78	6022.46	9296.37	NA	NA	NA	4006.2	4247.63	3215.36	4722.63	NA	NA	1737.32	2037.4	NA	NA	5314.19	NA	2291.53	NA	NA	3785.03	2198.15	13362.3
YNL134C	YNL134C	IGPQGALLGCDAAGQIVK	NA	12324.7	NA	1846	NA	NA	2251.42	3277.5	NA	4459.42	NA	NA	NA	15376.8	NA	NA	NA	NA	NA	NA	6706.04	NA	11849.4	4317.28	NA	NA	NA	NA	NA	3267.66	NA	6072.47	12808.2	NA	NA	NA	NA	NA	6768.74	NA	NA	2607.99	NA	NA	NA	NA	NA
YNL208W	YNL208W	GLFSTIVGGSAGAYAGSK	19624.8	NA	3055.13	NA	9914.46	6667.3	NA	6650.07	8407.09	8123.95	5419.7	11308.8	6367.88	16789.3	NA	17528.6	NA	4227.42	28156	3042.2	13307.3	10612.8	11511.1	2937.52	19008.2	16110.6	2830.16	6827.33	NA	13424.5	6775.51	10668.8	22847.9	7281.36	8196.13	3456.7	13011	13328.2	4489.59	16598.2	4627.64	23127	6089.4	NA	18982.2	15934.7	17320.8
YOL045W	PSK2	VFSADDDLLPLSIR	4119.38	3829.95	3961.51	3056	NA	3870.2	7869.7	4775.44	6134.1	6239.86	6833.23	8746.38	14388	9771.98	5005.93	NA	3054.24	5706.31	5203.59	3562.18	8208.19	7630.94	3445.83	6355.35	5817.32	NA	5066.35	5327.42	4054.12	5281.28	5681.74	7018.88	NA	9201.36	4051.96	3786.56	11070.8	11422.5	6007.62	3511.8	5211.74	9418.69	5868.47	4673.48	8633.09	6229.53	8094.69
YOR179C	SYC1	LIDCNSNPLKGRVESI	NA	30240.1	NA	NA	NA	NA	103735	NA	NA	NA	NA	147278	NA	152783	NA	32572.5	97511.1	NA	NA	NA	16289.9	9014.46	3693.58	5425.31	40324.7	NA	NA	NA	NA	NA	NA	NA	NA	NA	NA	9520.23	156715	NA	NA	19051	NA	101855	NA	NA	11015.8	50021.5	140533
YOR320C	GNT1	IIYKQFIFFRKVR	7771.55	10995.3	9614.93	11549.5	13879.7	12570.5	13779.4	12873.5	15381.2	12768	17934.7	NA	23247.2	4431.36	13831.6	13090.6	6440.71	15929.4	9185.55	12355	9129.85	12503.6	18368	15727.4	16075.8	18574.7	14670.9	14466.8	16195.5	21803.9	13857.5	15641.8	15042.9	21377.9	18489.3	17445.4	6225.52	20023	15761	15192.9	10435.5	14170.9	13576.1	9967.45	7275.07	11398.3	NA
YPL004C	LSP1	IPVLEQELVR	18445.6	6148.98	NA	6827	NA	1700.91	24418.1	7165.15	8047.44	18767.8	9361.4	15542.6	8960.91	20899	2207.48	22282.6	11546.8	4993.91	12105.9	6913.94	NA	21090.2	13314.9	12243.4	10738.3	33553.3	3243.42	1353.99	11722.3	19071.7	9642.37	11538.9	29505.2	NA	10927.6	7924.34	9888.99	5082.3	5258.05	20223.5	NA	28459.5	10347.3	1461	11166	17575.3	9401.5
YPL030W	TRM44	NAAIIGVENATLK	7418.34	9832.67	6533.23	10063	3419.36	9236.59	5262.66	10309.1	13597.4	16497.9	22588.2	3204.44	11307.1	2977.88	7312.88	10422.3	3091.37	11615.2	9194.49	12609.5	6340.2	15379.8	14678.3	11016.1	7111.64	12257.2	8211.98	12311.2	9951.63	14073.2	5710.67	16099.4	6173.97	12795.8	7437.2	11490.4	NA	15284.4	12691.4	12475.9	6029.47	3096.58	20665.8	16321.9	NA	10955.9	5370.79
YPR004C	YPR004C	LSNPITAVITGSK	6625.92	NA	5187.21	5342	NA	NA	NA	NA	2993.32	NA	NA	NA	5438.21	NA	NA	NA	2406.77	2299.46	2652.98	3052.11	NA	NA	NA	NA	3691.65	NA	2509.74	NA	NA	3945.32	NA	NA	NA	NA	NA	NA	NA	NA	7375.64	NA	NA	NA	NA	NA	2519.24	NA	3394.65
YDR381W	YRA1	EFFASQVGGVQR	6501.23	3184.61	2629.55	4255	4214.37	2901.35	6650.88	3726.27	6153.11	4231.04	7682.26	1932.21	5280.88	3219.42	6047.96	6289.4	5983.9	7110.68	4542.58	4631.88	5754.15	3593.64	7613.39	4856.25	7622.21	6961.27	4028.92	3846.79	5018.22	7153.23	4435.65	8125.21	8070.63	7148.46	7240.78	5457.65	5380.1	7321.88	2982.04	8248.58	5415.29	2603.85	3377.58	3290.76	3218.34	5327.35	4556.47
YPL074W	YTA6	NLDTLLVYVNEGLR	NA	14354.1	16835.8	16707	13231.5	17444.4	23361.8	13320.9	25655.4	15308.9	NA	NA	NA	NA	23556.7	23717.8	22015.8	28183	15533.7	13133.3	15340.5	14043.6	21524.2	17701.8	20181.8	NA	26480.5	27176.2	24682.2	NA	17642.7	16067.3	26674.2	NA	35587.4	23372.2	15392	28281.4	28274.6	26453.4	20076.8	NA	NA	NA	15963.4	23791	NA
YHR178W	STB5	NGAHCSYPGRAPRR	7025.44	2893.24	1225.18	892	2243.65	1465.06	NA	NA	NA	NA	NA	NA	5451.45	NA	2808.55	NA	NA	2209.65	3693.2	NA	6742.32	NA	1490.9	5765.74	4822.78	3486.74	2429.52	4744.26	NA	NA	1715.69	2080.1	NA	NA	NA	1633.07	NA	4474.81	1789.23	6530.63	2806.17	NA	4456.8	1971.08	NA	2360.58	NA
YGR285C	ZUO1	TADLYAAMGLSK	15283	NA	NA	5964	12027.1	9344.6	6893.15	7532.11	4125.71	2902.36	8567.63	7097.37	14881.2	7562.11	3924.53	2248.64	4425.95	9497.41	8224.35	8742.67	10985.2	8287.67	NA	8010.86	NA	2970.36	3651.27	2591.91	2363.82	3325.7	NA	11175.9	9898.06	7946.87	NA	NA	10643.9	13501.1	5553.36	14418.6	5255.36	5029.65	8821.57	10974.8	2610.57	6054.61	6581.57
[truncated: 48 more columns]
